## 22 **Introduction**

23 The genetic and epigenetic heterogeneity has been known to play a major role in the  
24 development and progression of complex diseases. The past two decades have seen a major  
25 surge in studies that characterize genes and loci associated with disease. The use of high-  
26 throughput omics technology and functional screenings have boosted our knowledge about  
27 genetic, epigenetic and metabolic factors underlying complex diseases<sup>1</sup>. As a result of these  
28 genetic and epigenetic screenings, we now know that the majority of complex diseases and  
29 genes/loci have a many-to-many relationship meaning that a complex disease is linked to  
30 many different genes and a gene/loci is associated with many different genes<sup>2</sup>.

31 Large high-throughput screening studies have typically used bulk tissue or whole blood to  
32 study disease associated genes (DAGs). However, the expression of each gene is known to  
33 vary between tissues and cell types<sup>3,4</sup>. Thus, bulk tissue- or blood-based studies on DAGs do  
34 not consider the role played by different cells and tissues in the disease biology. To improve  
35 the understanding and molecular basis of complex diseases, a large number of research  
36 groups and consortiums have started to functionally identify disease associated cells (DACs)  
37 or tissue types<sup>3-7</sup>. The Genotype-Tissue Expression (GTEx) is one such valuable project,  
38 which maps gene expression profiles of 54 different human tissue types and the  
39 corresponding expression quantitative trait loci (eQTLs)<sup>5-7</sup>. Furthermore, the growth of single  
40 cell technologies have advanced our understanding of DACs and have helped in identifying  
41 cell types associated with complex diseases including cancer<sup>8</sup>, Alzheimer's<sup>9</sup>, rheumatoid  
42 arthritis<sup>10</sup>, among others.

43 The immune system is known to play a key role in the development and progression of  
44 immune-mediated as well as non-immune mediated chronic diseases. A large number of  
45 association and functional studies have shown that multiple DAGs are expressed in immune  
46 cells and perturbing these DAGs can modulate immune cell functions<sup>11</sup>. However, very few  
47 studies have explored the impact of DAGs on specific cell types and even fewer on immune  
48 cells, many of which focus on limited number of cell subsets<sup>12-16</sup>. Recently Schmiedel *et al.*  
49 studied the effect of genetic variants on the expression of genes in 13 different immune cell  
50 types<sup>17</sup>. However, this study largely focused on the analysis of genetic variants and their  
51 impact on a total of 13 immune cell types: monocytes (classical and non-classical), NK cells,  
52 naïve B-cells and nine sub-populations of T-cells.

53 In this study, we mapped the largest available and expert curated disease-gene network (from  
54 the DisGeNet curated from 16 different databases) on the largest *immunome* data curated by  
55 us comprising gene expression profiles of 40 different immune cell types. We then quantified  
56 the effects of 13,510 DAGs on the *immunome*, to identify DACs for 15,367 different diseases  
57 in the DisGeNet. Using the DACs and the DAGs, we constructed the Disease-gene IMMune  
58 cell Expression (DIME) network. We use the DIME network to: (1) study the underlying cell-  
59 specific mechanisms of complex diseases; (2) identify cell-specific targets for complex  
60 disease; (3) identify networks of genes and cells that are commonly associated with different  
61 pairs of diseases; and (4) predict drug repurposing targets towards identified disease  
62 mechanisms shared between different diseases. We further built a user-friendly shinyapp  
63 called DIME (<https://bitbucket.org/systemsimmunology/dime>), which can be used to identify  
64 DACs and construct DIME network for: (1) diseases from the DisGeNet, (2) diseases from  
65 the EBI genome wide association study (GWAS) catalogue, or (3) custom set of genes  
66 defined by the user.

67

## 68 **Methods**

### 69 **Transcriptome data - *Immunome***

70 The transcriptome data consists of RNA-sequencing datasets of 40 different immune cell  
71 types curated using 316 samples from a total of 27 publicly available datasets (see  
72 **Supplementary Table 1** for list of GEO datasets and samples used). The 40 different  
73 immune cells cover the entire hematopoietic stem cell differentiation tree comprising of 9  
74 progenitors, 19 lymphoid, and 12 myeloid cell types. The samples used here were manually  
75 curated considering only the unstimulated (except for macrophages, that were monocyte  
76 derived) immune cells that were sorted using Fluorescence-activated cell sorting (FACS) and  
77 were isolated from either blood, bone marrow or cord blood from healthy donors. All the  
78 selected datasets were downloaded as FASTQ files using the fastq-dump tool from  
79 sratoolkit<sup>18</sup>. The “—split-files” option was given if the library type was paired end  
80 sequencing. FASTQ files were then aligned to reference genome (GRCH.Hg38.79) using  
81 STAR aligner<sup>19</sup>. The result is a SAM file which was then converted into a sorted BAM file  
82 using the samtools program<sup>20</sup>. These were then used to calculate the count of aligned reads  
83 using the HTSeq program<sup>21</sup> with the mode option “intersection non-empty”. HTSeq was run

84 for all possible stranded mode options, the count file with the maximum counts was chosen as  
85 the respective count file for the sample.

86 The data was then filtered by removing all genes that had less than 20 read counts in 95  
87 percent of the samples using R programming. The filtered data was then lane normalized  
88 using the “betweenLaneNormalization” function from the RUVSeq package<sup>22</sup>. The RUVr  
89 method from RUVSeq was used to identify residual factors contributing to the batch effect.  
90 The resulting filtered, batch corrected and normalized data had expression for 34,906 genes  
91 that was void of any observable batch effect. We calculated counts per million (cpm) for the  
92 filtered genes and used cpm as the gene expression measure. We then used the median gene  
93 expression for each cell type for the rest of the analysis. This processed, batch corrected,  
94 normalized and median representative data of 40 immune cells is referred to as the  
95 *immunome*.

96

#### 97 **Disease gene network from DisGeNet**

98 The full disease gene association network from DisGeNet<sup>23</sup> was downloaded from the  
99 DisGeNet database ([www.disgenet.org/downloads](http://www.disgenet.org/downloads)). All HLA associated genes was removed  
100 from the network, this was done to ensure that bias towards myeloid cells and B cells are  
101 removed, since the HLA genes are largely expressed by these cells. The resulting network  
102 was further filtered to include only those genes that were present in the *immunome*. The final  
103 network comprised of 15367 diseases and 13510 DAGs.

104 The DisGeNet consists of expert curated disease-gene interactions from 16 different  
105 databases: UNIPROT, CGI, ClinGen, Genomics England, CTD, PsyGeNET, Orphanet, RGD,  
106 MGD, CTD, Human Phenotype Ontology, Clinvar, GWAS catalogue, GWAS DB, LHDGN  
107 and BeFree. The DisGeNet is the largest and most comprehensive disease-gene association  
108 network available in the literature that was known to us. We also tested our methods on more  
109 specific disease networks such as those from the EBI GWAS database.

110

#### 111 **Other disease gene networks - EBI GWAS data**

112 In addition to the DisGeNet, we also used a refined GWAS based dataset from the EBI<sup>24</sup>. The  
113 GWAS catalogue of Version 1.0, e89, was downloaded from the EBI website, which

114 contained information on the disease associated SNP for about 1900 diseases/traits. The  
115 reported p-value of all the disease associated SNP in the catalogue was  $\leq 0.05$ . The catalogue  
116 also provided the corresponding mapped gene information for all the SNP which was used to  
117 construct the disease to gene association network. We further filtered this network using the  
118 same filtering criteria that was used for the DisGeNet. The EBI GWAS dataset was used to  
119 infer SNP based disease cell associations.

120

### 121 **Mapping disease gene network to *Immunome* data**

122 For a given disease  $D$  and its  $DAG_D$ , we first extracted the corresponding *Immunome*  
123 expression matrix. This expression matrix ( $X_D$ ) comprised the gene expression of the  $DAG_D$   
124 across the 40 cells forms as the input data upon which further analysis was performed. Thus,  
125 the dimension of each  $X_D$  was given as:

$$126 \quad \quad \quad \dim(X_D) = \text{length}(DAG_D) \times 40,$$

127 where,  $\text{length}(DAG_D)$  is the number of DAGs in disease  $D$  and 40 corresponds to the number  
128 of cell types in the *immunome* data.

129

### 130 **Using NMF to cluster $X_D$ into $k$ classes**

131 We used the NMF package<sup>25</sup> in R and applied the non-negative matrix factorization method  
132 using Brunet's<sup>26</sup> algorithm to the expression matrix ( $X_D$ ) to factor it into two matrices namely  
133  $W_D$  and  $H_D$  such that.

$$134 \quad \quad \quad X_D \approx W_D H_D,$$

135 where,  $W_D$  and  $H_D$  are the basis and coefficient matrices computed by the NMF. The  
136 dimensions of  $W_D$  and  $H_D$  are given as:

$$137 \quad \quad \quad \dim(W_D) = \text{length}(DAG_D) \times k,$$

$$138 \quad \quad \quad \dim(H_D) = k \times 40,$$

139 where,  $k$  is the number of classes/clusters that splits the data, such that it satisfies the above  
140 NMF equation. The  $W_D$  matrix comprises of the weights of the DAGs across the  $k$  clusters (in  
141 each column) and the  $H_D$  matrix comprises of the weights of the cells in the corresponding  $k$

142 clusters (in each row). We used Brunet *et al.* method to identify the ideal  $k$  value using the  
 143 cophenetic correlation coefficient method<sup>26</sup>.

144

#### 145 **Identifying the key $DAG_D$ and $DAC_D$ from $W_D$ and $H_D$**

146 The NMF algorithm clusters the data into  $k$  clusters such that, in each cluster ‘ $i$ ’, where  $i \in$   
 147  $(1, \dots, k)$ , the genes that have high values in  $w_D^i$  are constitutively expressed by the cells that  
 148 have high values in  $h_D^i$ . Where,  $w_D^i$  is the  $i^{\text{th}}$  column of  $W_D$  and  $h_D^i$  is the  $i^{\text{th}}$  row of  $H_D$ . For  
 149 each cluster  $i$ , we chose the cell-gene pairs that were in the top 25<sup>th</sup> percentile range of their  
 150 corresponding  $w_D^i$  and  $h_D^i$  values. These cells and their corresponding gene pairs are regarded  
 151 as the key  $DAC_D$  and  $DAG_D$  respectively. The cell-gene pairs were extracted from all the  
 152 clusters and were compiled together. The resulting cell-gene pairs of all the clusters form the  
 153 edges of the **Disease-gene to IMMune cell Expression network**, hereby referred as the **DIME**  
 154 network.

155

#### 156 **Identifying the key cluster**

157 We then identified the largest weighted cluster among the  $k$  clusters identified by the NMF.  
 158 That is, the subset of genes and cells of  $X_D$  that can capture most of its expression pattern. We  
 159 did this by using the following approach.

160 Since  $X_D$ ,  $W_D$  and  $H_D$  can be represented as below:

$$161 \quad X_D \approx W_D H_D = \begin{bmatrix} | & | & | & | \\ w_D^1 & w_D^2 & \dots & w_D^k \\ | & | & | & | \end{bmatrix} \begin{bmatrix} - & h_D^1 & - \\ - & h_D^2 & - \\ - & \vdots & - \\ - & h_D^k & - \end{bmatrix} = \sum_{i=1}^k w_D^i h_D^i.$$

162

163 We calculated the Frobenius norm of each  $w_D^i h_D^i$  for all values of  $i$ . We then identified the  
 164 cluster (represented as  $c$ ) for which  $\|w_D^i h_D^i\|_F$  is the maximum. This can be mathematically  
 165 represented as:

$$166 \quad c = \operatorname{argmax}(\|w_D^i h_D^i\|_F); i \in \{1, \dots, k\},$$

167

168 where, the  $c^{\text{th}}$  cluster represents that cluster which maximally captures/represents the  
169 expression matrix  $X_D$ . We used the  $w_D^c$  as the scores for the  $DAG_D$  and  $h_D^c$  as the scores for the  
170  $DAC_D$ .

$$171 \quad \quad \quad DAG_D \text{ score} = w_D^c,$$

$$172 \quad \quad \quad DAC_D \text{ score} = h_D^c,$$

173 The scores were scaled between 0 and 1, with 1 representing the cell or gene with the highest  
174 score.

175

### 176 **Pleiotropic associations**

177 To identify common mechanisms between two diseases, we looked at their overlapping cell-  
178 gene connections in their corresponding DIME networks. Jaccards' index (JI) was used to  
179 measure the overlap between the two diseases with Fisher's exact test (FET) used to obtain  
180 confidence p-value for the given overlap. The overlapping genes were used to calculate JI and  
181 statistical significance of overlap using FET. The pleiotropy based overlapping cell-gene  
182 network between the two diseases is referred to as the DIME-pleiotropy network.

183

### 184 **Integrating drug-gene network**

185 The drug to gene target database from DGIdb was downloaded<sup>27</sup>. The data was filtered to  
186 contain only the ChEMBL interactions and only those pertaining to the drugs approved by  
187 the food and drug administration (FDA) of USA. This FDA approved drug to gene target  
188 interaction serves as the drug-gene network in this study. To identify potential drug  
189 candidates from the drug-gene network for disease  $D$ , we choose its key  $DAG_D$  as identified  
190 in the previous step and extracted its corresponding target drugs from the drug-gene network.  
191 This network between the drugs and the key  $DAG_D$  is referred to as the DIME-drug network  
192 for disease  $D$ . The DIME-drug network represents all the drugs that target the key  $DAG_D$   
193 identified in the given DIME network. To identify potential common acting drugs between  
194 different diseases, we used their corresponding DIME-pleiotropy network and extracted the  
195 drug-gene connections between the cell-gene and the drugs in drug-gene network. The drugs  
196 identified using this approach represent those that act on the common mechanisms between  
197 the two diseases and can be potential candidates for drug repurposing.

198

### 199 **Rationale for restricting analysis to only diseases with $\geq 100$ DAGs**

200 The filtered disease-gene network of the DisGeNet comprised of DAGs for about 15,367  
201 diseases. This could make the pleiotropy analysis between diseases extremely cumbersome,  
202 with the number of disease-to-disease comparisons reaching as large as 118,064,661.  
203 Additionally, to have sufficient number of DAC-DAG associations in the DIME-pleiotropy  
204 network and also have sufficient number of drug-target gene associations in the DIME-drug  
205 network, we used a smaller subset of diseases but with larger DAGs associated to them. We  
206 found by looking at the distribution of DAGs across the diseases, that the number of diseases  
207 with  $\geq 100$  DAGs were fewer in number, i.e., 613 diseases. This was sufficiently large DAC-  
208 DAG associations for the pleiotropy analysis and less cumbersome to analyze the  
209 comparisons (187,578). Hence, we choose those diseases with  $\geq 100$  DAGs. All analysis  
210 presented in this study have been performed on this disease subset.

211

### 212 **DIME shinyapp**

213 To construct the DIME and DIME-drug network for other diseases not mentioned in this  
214 study or using a custom gene input, we built a tool in R/Bioconductor called DIME that is  
215 available as a shiny app (<https://bitbucket.org/systemsimmunology/dime>). The app can be  
216 used to identify the key DAC, DAG and the DIME-drug network for the diseases from the  
217 DisGeNet, the EBI-GWAS catalogue or for custom set of genes from the user.

218

## 219 **Results**

220 The aim of this study is to identify disease associated cell types (DACs) based on the existing  
221 disease gene network, and to further identify disease associated gene (DAG) subsets that may  
222 perturb the associated immune cells. To achieve this, we integrated our *immunome* data with  
223 the disease network from DisGeNet and used the non-negative matrix factorization (NMF)  
224 method to identify those subsets of genes and cells that maximally represent the **D**isease gene  
225 **I**Mmune cell **E**xpression (DIME) network, as illustrated in **Figure 1A**. The constructed  
226 immunome dataset comprises 40 different cell types and is the largest bulk RNASeq meta-  
227 dataset of the immune cell types known to us. The filtered disease-gene network from



228 DisGeNet consists of associations between 15,367 diseases and 13,510 DAGs. In this  
229 massive disease network, numerous DAGs were found to be common between both  
230 phenotypically similar and distinct diseases. We explore these common DAG patterns in  
231 more detail in the next section.

232

### 233 **Common DAGs of phenotypically distinct diseases**

234 The 15,367 diseases in the DisGeNet belong to 29 different disease MeSH (Medical Subject  
235 Headings) terms (**Figure 1B**). The MeSH-MeSH network in **Figure 1B** depicts the  
236 connections between the different MeSH terms, where the thickness of the connections  
237 represents the number of DAGs common between the different MeSH terms. The neoplasm  
238 MeSH term was the most well connected disease category in the network. The highest  
239 number of common DAGs (6,959 DAGs) between two different MeSH terms was observed  
240 between neoplasm and digestive system diseases. Other top MeSH-MeSH connections that  
241 had more than 5,000 common DAGs include those between neoplasm and that of the skin and  
242 connective tissue, nervous system, congenital, endocrine system, and female urogenital  
243 diseases and pregnancy complications. Thus, the MeSH-MeSH gene network revealed the  
244 shared DAGs across phenotypically distinct diseases belonging to different MeSH terms.

245 We further studied the DAG patterns across MeSH terms and found that TP53 was  
246 preferentially associated with diseases categorized under the neoplasm MeSH term (**Figure**  
247 **1C**). Interestingly, TP53 was also associated with numerous diseases from various other  
248 MeSH terms such as immune system diseases, nervous system diseases, and skin and  
249 connective tissue diseases. Similarly, TNF was associated with numerous diseases from  
250 various MeSH terms including immune system diseases (**Figure 1D**). APOE was largely  
251 associated with nervous system diseases, and ACE was largely associated with cardiovascular  
252 diseases (**Figure 1E and F**). TLR4 and CXCL8 were prevalently associated to several MeSH  
253 terms (**Figure 1G and H**). The above-mentioned genes (**Figure 1C-1F**) are those that are  
254 either the top represented (degree) genes across all diseases or for disease within specific  
255 MeSH terms. More examples of DAGs associated with specific MeSH terms and their degree  
256 can be found in the **Supplementary Figure 1**. Majority of the DAGs mapped to two or more  
257 MeSH terms (**Figure 1I**) or diseases (**Figure 1J**) also hinting towards shared disease  
258 mechanisms between phenotypically distinct diseases. These genes that are associated to  
259 many diseases/MeSH terms (i.e. having high degree) were regarded as the hub genes of the

260 disease-gene network. We ranked the DAGs based on their degree and found TP53, TNF,  
261 VEGFA, BCL2, IL1B as the top 5 DAGs each being associated with >750 diseases (**Figure**  
262 **1K** and **Supplementary Figure 1**).

263

### 264 **Relevance of the immune system**

265 We further evaluated the expression of the hub genes identified in the previous step, in the  
266 *immunome* data. The rationale was to assess if the hub genes representing the core of the  
267 disease-gene network were important to the immune system. Indeed, we found that many of  
268 the hub genes of the disease-gene network were expressed constitutively by either all immune  
269 cells or by some specific immune cells, as seen in **Figure 1K**. For example, the nervous  
270 system associated gene, APOE, important to many of neurological diseases such as  
271 Alzheimer's and Parkinson<sup>28</sup> were found to be expressed specifically by macrophages, as  
272 seen in **Figure 1L**. Studies have shown that genetic polymorphisms in APOE protein leads to  
273 defective clearance of the A $\beta$  plaques by macrophages<sup>29-31</sup>. Thus, conferring macrophages as  
274 one of the key players of the disease. Such links between DAGs, to observing altered  
275 function in a cell type, questions the need to study DAGs by integrating cell-specific  
276 expression information.

277

### 278 **Identifying disease associated cell types**

279 We further identified such disease associated cells (DACs) based on the DAGs and report  
280 DACs for about 600 diseases in the disease-gene network (see Methods). The immune cells  
281 can be broadly categorized as myeloids, lymphoids and progenitors. Using the DAC profiles  
282 of about 600 diseases, we observed that in most diseases, DAGs do not associate with all  
283 immune cells but tend to associate with specific immune cells or with specific category of  
284 immune cells (**Supplementary Figure 2**). We observed from these DAC profiles that several  
285 phenotypically different diseases had similar DAC profiles. For example, diseases such as  
286 skin carcinoma, muscle degeneration, juvenile arthritis, epilepsy, etc. clustered together,  
287 showing progenitors as their top DACs. Similarly, peripheral T-cell lymphoma, celiac  
288 disease, atopic dermatitis, malignant glioma, basal cell carcinoma, etc. clustered together,  
289 with lymphoid cells as the top DACs. Interestingly, systemic lupus erythematosus (SLE),  
290 heart failure, myocardial infarction, colitis, type 1 diabetes, etc. cluster together showing

291 myeloid cells as their top DACs. Thus the DAC profiles like the DAG profiles showed that  
292 phenotypically different diseases had similar DAC pattern.

293 We constructed the DIME network for different diseases individually, the DIME network  
294 consists of the top DACs and their respective DAGs, (see methods). The DIME network  
295 represents the key cell-gene mechanisms that can be drawn from the given set of DAGs. As  
296 proof of concept, we present here the DIME network of lymphoid leukemia (**Figure 2A**), a  
297 group of blood cancer that typically affects the lymphocytes. The DIME network revealed 4  
298 DAC clusters for lymphoid leukemia. The key DAC cluster comprised of lymphoid  
299 progenitor cells as well as myeloid progenitor cells. The key DAGs contributing to this  
300 cluster included genes associated with hematopoiesis such as RPS14, HSP90AA1, MPO,  
301 ETV6, ATF4 and TAL1. The other key DAC cluster comprised of all the subsets of T cells,  
302 primarily the CD4<sup>+</sup> T cells. The key DAGs contributing to this cluster included ETS1,  
303 CXCR4, IKZF1, ATM, LCK, and KMT2A. The pathway enrichment (**Supplementary**  
304 **Figure 4B**) of these genes revealed pathways associated to TCR and BCR signaling and  
305 PI3K/AKT signaling. Interestingly, these pathways have been shown to be important for  
306 survival of cancer cells and are targets for anti-cancer drugs in acute and chronic lymphoid  
307 leukemia<sup>32</sup>. Thus the DIME network of lymphoid leukemia revealed the key DAGs and  
308 DACs implicated in the disease.

309 We then explored the DIME network of different kinds of rheumatic and/or fibrotic diseases,  
310 such as systemic scleroderma (MeSH: skin disease), pulmonary fibrosis (MeSH: respiratory  
311 tract disease) and SLE (MeSH: immune system disease). Moreover, we aimed to characterize  
312 the diseases on the basis of the DAGs, DACs and the accompanying DIME networks. The  
313 DIME network of systemic scleroderma, an autoimmune rheumatic condition with chronic  
314 inflammation and fibrotic phenotype, revealed a complex relationship between their DAGs  
315 and their DACs (**Figure 2B**). For systemic scleroderma, myeloid cells (neutrophils,  
316 granulocytes, BDCA1<sup>+</sup>CD14<sup>+</sup>, and CD11c myeloid dendritic cells), and lymphoid cells (NK,  
317 CD4<sup>+</sup> T regulatory, ILC3, and ILC2) were identified as key cluster of DACs (see methods).  
318 The key DAGs contributing to this cluster included PTPRC, FOS, SRRM2, MSN, JUNB,  
319 CXCR4, ITGB2, and TNFAIP3 genes. For systemic scleroderma, the other key DAC cluster  
320 comprised myeloid cells (macrophages and pDCs) and myeloid progenitor cells. The key  
321 DAGs contributing to this cluster included HSP90AB1, SPP1, HSP90AA1, MMP9, WNK1,  
322 HIF1A and IRF8. The two systemic scleroderma associated DAC clusters together were  
323 enriched in DAGs from interleukin signaling, TGF beta signaling, TLR signaling, ECM

324 organization and neutrophil degranulation pathways (**Supplementary Figure 3A**). Of which,  
325 evidently, TGF beta is known to play an essential role in the pathogenesis of fibrosis<sup>33</sup>.  
326 Likewise, the neutrophil degranulation pathway or otherwise known as NETosis, is the  
327 mechanism by which neutrophils exhibit defensive mechanisms to trap and kill foreign  
328 bodies<sup>34</sup>. And this pathway has been found to be implicated in other autoimmune diseases,  
329 and is now being currently investigated in clinical trials<sup>35</sup>. Interestingly, we found neutrophils  
330 and its NETosis associated genes to be in the top cluster of the DIME network for systemic  
331 scleroderma.

332 We then constructed the DIME network of another fibrotic disease, pulmonary fibrosis. The  
333 DIME network revealed 4 DAC clusters for pulmonary fibrosis (**Figure 2C**). Similar to  
334 systemic scleroderma, we found a DAC cluster comprising of T-cells and NK cells enriched  
335 in DAGs associated with TGF beta signaling (**Supplementary Figure 3B**). Interestingly, we  
336 also found that for pulmonary fibrosis neutrophils-granulocytes, macrophages,  
337 BDCA1<sup>+</sup>CD14<sup>+</sup> cells, pDCs and myeloid progenitors were among the top DACs similar to  
338 that of systemic scleroderma, (**Supplementary Figure 3B**). We also found an enrichment of  
339 NLRP3 pathway genes, which are known to play a role in the collagen deposition  
340 mechanisms commonly dysregulated in fibrosis<sup>36</sup>.

341 We then studied the DIME network of SLE, an autoimmune disease. The DIME network  
342 revealed 2 DAC clusters for SLE (**Figure 2D**). The key cluster comprised of myeloid cells  
343 like neutrophils-granulocytes, macrophage M1, BDCA1<sup>+</sup>CD14<sup>+</sup> and monocytes as the DACs.  
344 The key DAGs contributing to this cluster included CD74, FOS, LYZ, SOD2 and  
345 HSP90AB1. The other cluster comprised of CD4<sup>+</sup> TEMRA, CD4<sup>+</sup> TEM, CD4<sup>+</sup> TCM and  
346 CD4<sup>+</sup> TH1 as their DACs. The key DAGs contributing to this cluster included B2M, IGHG3,  
347 IL7R, ETS1, RPS19, and TNFAIP3. The pathway enrichment for the SLE DIME network  
348 includes pathways that are heavily described in the literature for SLE, such as the neutrophil  
349 degranulation pathways or NETosis<sup>37-41</sup>, interleukin 4 and interleukin 13 signaling<sup>42,43</sup>, TLR  
350 signaling pathway<sup>44</sup>, translocation of ZAP70 to immunological synapsis<sup>45</sup>, and immune-  
351 regulatory interactions between lymphoid and non-lymphoid cells (**Supplementary Figure**  
352 **4A**).

353 The DIME networks revealed immune system mediated mechanisms for the different  
354 diseases. As observed in the **Figure 2, Supplementary Figure 3 and 4**, the rheumatic and/or  
355 fibrotic diseases such as SLE and SSc, had overlap in specific cell-gene mechanisms

356 including those related to the neutrophil degranulation, degradation of ECM, interleukin and  
357 TGF beta signaling pathways. These pathways and common mechanisms observed in the  
358 DIME networks could serve as additional layers to understand the pathogenesis of these type  
359 I interferon driven diseases<sup>46</sup>. We further explored such common mechanisms based on the  
360 cell-gene relationships in the next section.

361

### 362 **Pleiotropy based on DIME**

363 Pleiotropy is when one gene affects two or more diseases<sup>47</sup>. Pleiotropy has been observed in  
364 several studies for many different diseases based on gene mutation to phenotype  
365 associations<sup>48</sup>. Unlike most pleiotropy studies performed in the past that looks at only the  
366 common DAGs between two diseases, we used a different approach. Since the DIME  
367 networks from the previous analysis (for example, between SSc and pulmonary fibrosis)  
368 revealed several overlapping cell-gene connections, we extended this approach to look for  
369 cell-gene connections that are common between the DIME networks of all possible pairs of  
370 diseases. Hence, we define pleiotropy in this study as the cell-gene connections that are found  
371 in one or more diseases. Using this approach, we constructed the pleiotropy network as  
372 shown in **Figure 3A**. The pleiotropy network consists of diseases as nodes. The nodes are  
373 connected if there exists a significant ( $JI \geq 0.1$  and FET p-value  $\leq 0.01$ ) number of common  
374 cell-gene connections between their corresponding DIME networks, (see methods). The  
375 network shown in **Figure 3A** is trimmed to contain only those nodes with degree  $\geq 2$ . The  
376 node colors represent the MeSH term (as shown in **Figure 1B**) of the disease. The grey  
377 colored nodes represent those diseases for which the MeSH term ontology was not available  
378 from the DisGeNet. As seen from **Figure 3A**, several cancer related diseases (shown by  
379 orange color for neoplasm MeSH term) cluster together. Same can be observed for the eye  
380 related disease (shown by green color MeSH term) and the chemically induced disorders  
381 (shown by pink and yellow color MeSH terms) seen in the bottom of the network **Figure 3A**.  
382 These clusters together highlight the similar mechanisms (cell-gene connections) between  
383 these diseases.

384 Within this pleiotropy network, we further looked at diseases that belong to different MeSH  
385 terms and searched for common cell-gene mechanistic patterns between them. To do so, we  
386 constructed the DIME-pleiotropy network of several pairs of phenotypically distinct  
387 rheumatic diseases within the pleiotropy network. We present here some examples of the

388 DIME-pleiotropy network that had a JI similarity of  $\geq 0.1$ . In the DIME-pleiotropy network  
389 (**Figure 3B**) of Crohn's disease (MeSH: digestive system disease) and psoriasis (MeSH: skin  
390 disease), we found cell-gene networks of lymphoid ( $CD4^+$ , NK and ILC's) and myeloid cells.  
391 The pathway enrichment of the DAGs in this DIME-pleiotropy network revealed pathways  
392 related to TCR signaling, interleukin signaling, neutrophil degranulation and regulation of  
393 TLR (**Supplementary Figure 5A**). As observed in the DIME-pleiotropy network (**Figure**  
394 **3B**),  $CD4^+$  TH1 cells have been implicated in the pathogenesis of both Crohn's disease and  
395 psoriasis<sup>49,50</sup>. Likewise, in the DIME-pleiotropy network (**Figure 3C**) of SSc (MeSH: skin  
396 disease) and pulmonary fibrosis (MeSH: respiratory tract disease), we found cell-gene  
397 networks between progenitors and pDCs, NK cells,  $CD4^+$  TEMRA and  $CD4^+$  T regulatory,  
398 and other myeloid cells. The pathway enrichment of the DAGs in this DIME-pleiotropy  
399 network revealed pathways (**Supplementary Figure 5B**) related to TGF beta receptor  
400 signaling, interleukin, ECM and integrin cell surface interactions. Both of these being fibrotic  
401 diseases, the involvement of TGF beta signaling and ECM is well represented in the DIME-  
402 pleiotropy network and known to be implicated in literature<sup>51-53</sup>. Interestingly, we also  
403 observed cell-gene network between macrophages and genes like TGF-B1, MMP9 and  
404 TIMP1. Evidently, macrophages may exacerbate pulmonary fibrosis by TGF beta production  
405 or cause ECM degradation via matrix metalloproteinase (MMP) activities<sup>54</sup>. The DIME-  
406 pleiotropy network has captured the intricate network of these key DAGs and the cells  
407 (macrophages) accurately.

408 Patients with rheumatoid arthritis (RA) have an increased risk of cancer due to the severe  
409 regimen of disease modifying anti-rheumatic drugs<sup>55</sup>. However, RA patients seem to have  
410 lower risk of colon cancer in comparison to the general population<sup>55,56</sup>. To explore the factors  
411 responsible for the protective effect against colon cancer in RA patients, we constructed the  
412 DIME-pleiotropy network (**Figure 3D**) of RA (MeSH: immune system) and colon carcinoma  
413 (MeSH: neoplasm). We found cell-gene networks of  $CD4^+$  T cells and many of the myeloid  
414 cells. The pathway enrichment of the DAGs in this DIME-pleiotropy network revealed  
415 pathways (**Supplementary Figure 5C**) related to TLR signaling, interleukin signaling,  
416 neutrophil degranulation, ECM organization, FCER1 and EGFR signaling. Although clear  
417 signatures of the protective effect were not observed, we did find the presence of PTGS1 and  
418 PTGS2 (also known as COX1 and COX2) in the DIME-pleiotropy network of RA and colon  
419 carcinoma. These genes are targets of the non-steroidal anti-inflammatory drugs (NSAIDs)  
420 that are frequently taken by RA patients. Evidently, NSAIDs like aspirin have been shown to

421 confer protective affect against colorectal cancer even in lower doses<sup>57</sup>. Perhaps the missing  
422 link in the protective effect of RA in colon cancer lies in the anti-inflammatory role of the  
423 NSAIDs taken by the RA patients that target the pro-inflammatory mediators<sup>58</sup> such as  
424 PTGS1 and PTGS2 in both diseases, thus conferring protection.

425 These DIME-pleiotropy analyses highlighted the common cell-gene relationships between  
426 the different diseases (**Figure 3B-D**). Thus, making such pleiotropic relationships less  
427 “ubiquitous”<sup>59</sup> but rather based on the similar cell-gene mechanism implicated between the  
428 two diseases. We used this to further capture the plausible drug targets based on the immune  
429 system mechanism as we identified with RA and colon cancer.

430

### 431 **Immunome mediated drug repurposing**

432 Using our immunome data, the DisGeNet and the NMF, we constructed the DIME network  
433 and the DIME-pleiotropy network (as described before and as depicted in **Figure 4A**, part 1  
434 and 2). We extended this approach to construct drug-gene network to identify drug targets  
435 based on the DIME network (**Figure 4A**, part 3), which are referred to as the DIME-drug  
436 network. We then used the pleiotropy method used before to then identify common drug  
437 targets between the diseases (**Figure 4A**, part 4) based on the DIME-drug networks, which  
438 forms the basis of the immunome mediated drug repurposing, (see methods). **Figure 4B**  
439 shows an example of the DIME-drug network of Crohn’s disease that represents the  
440 connections between the top DAGs of Crohn’s disease as the potential drug targets and their  
441 associated drugs. The DIME-drug network of Crohn’s disease identified some known drugs  
442 like the corticosteroids (such as prednisone, methylprednisolone, hydrocortisone and  
443 budesonide, targets of NR3C1) and the aminosalicylates (such as sulfasalazine and  
444 mesalamine, targets of PTGS2 and ALOX5) that are current line of drugs used in treatment of  
445 Crohn’s disease<sup>60</sup>. In addition to the known drugs and drug targets, the DIME-drug network  
446 of Crohn’s disease also revealed some novel and potentially interesting drugs and drug  
447 targets, such as lifitegrast that target the integrins, ITGB2 and ITGAL. This is particularly  
448 interesting because integrin based therapies (such as natalizumab and vedolizumab) are  
449 already in use for Crohn’s disease<sup>61</sup>. Exploring other integrin based therapies for Crohn’s  
450 disease may be beneficial since both ITGAL and ITGB2 show in the top DAGs and are also  
451 implicated in Crohn’s disease<sup>62,63</sup>.

452 As we discovered common cell-gene mechanisms in the DIME-pleiotropy network in the  
453 previous analysis (**Figure 3**), we extended this approach to discover plausible drugs and drug  
454 targets between the disease pair comparison to find new candidates for drug repurposing, we  
455 refer to these analysis as the pleiotropy-drug network analysis (**Figure 4A**, part 4). In  
456 addition to the drug targets revealed from the DIME-drug network of Crohn's disease, the  
457 pleiotropy drug network of Crohn's disease and psoriasis (**Figure 4C**), comprised some  
458 known drug targets such as IL6R for psoriasis and IL1B for Crohn's disease. The associated  
459 drug of IL6R, tocilizumab is known to be used in the treatment for psoriasis<sup>64</sup>. Interestingly,  
460 anti IL6 therapy has been shown to have promising clinical response for Crohn's disease as  
461 well<sup>65</sup>. Similarly, anti-IL1 therapies have also been explored for psoriasis and have shown  
462 beneficial clinical outcome<sup>64</sup>. Thus, DIME-network identifies established and novel potential  
463 targets for drug repurposing.

464 Studying the pleiotropy-drug network of fibrotic disease systemic scleroderma and  
465 pulmonary fibrosis (**Figure 4D**), we found the DNMT1 (a DNA methyl transferase enzyme)  
466 targeting drugs decitabine and azacitidine. Epigenetic modulation as a therapy has been  
467 explored as a treatment option in SSc<sup>66</sup>. Similarly, in the pleiotropy drug network of SSc and  
468 myocardial infarction (MeSH: Cardiovascular), **Figure 4E**, we found canakinumab an IL1B  
469 targeting drug. Anti-IL drugs have also been tested on patients with myocardial infarction and  
470 were shown to have fewer cardiovascular events than placebo<sup>67</sup>. The pleiotropy drug network  
471 of rheumatoid arthritis and colon carcinoma was found to be larger (**Figure 4F**), due to the  
472 larger overlap between the two diseases, see **Figure 3D**. The network shows possibilities of  
473 using anti-inflammatory drugs for treatment or prevention of colon carcinoma as discussed  
474 before. With drugs that target genes such as IL2RG, TYK2, PTGS1, PTGS2, etc. that are  
475 widely used to treat anti-inflammatory or immune mediated diseases, these can be used as  
476 preventive care drugs or for use along with chemotherapy<sup>68</sup>.

477 We also looked at the known drug targets that are present across the DIME networks of the  
478 613 diseases analyzed by us. We found the top 5 drug targets to be BCL2 (**Figure 4B, C, E,**  
479 **and F**), PTGS2 (**Figure 4B, 4E-4F**), PIK3CD (**Figure 4D, 4E**), CXCR4 (**Figure 4B-4F**) and  
480 IL1B (**Figure 4B, C, E, and F**) that were implicated in the DIME networks of more than 200  
481 out of the 613 diseases analyzed by us. The CXCR4 targetable by plerixafor is present in all  
482 of the pleiotropy-drug networks shown here (**Figure 4B-4F**). Plerixafor is a drug intended for  
483 use in cancer after stem cell transplantation to initiate migration of stem cells in the  
484 bloodstream<sup>69</sup>. This drug is now in clinical trials (NCT01413100) to be evaluated for use



485 after autologous transplant in patients with scleroderma<sup>70</sup>. Such trials may potentially be  
486 extended to other immune diseases like psoriasis, Crohn's disease, rheumatoid arthritis, and  
487 potentially for a variety of other phenotypically distinct rheumatic diseases that are driven by  
488 CXCR4 mediated dysregulation of immune system. Many such potential drug repurposing  
489 targets (enlisted in **Supplementary Table 2**) can be similarly evaluated in future studies and  
490 trials.

491

## 492 **Discussion**

493 Despite decades of experimental data on the understanding of the molecular mechanism of  
494 diseases, we know little about the perturbations in the niche cell compartments that are  
495 specific to the disease. To address this gap several efforts at the tissue<sup>5-7</sup> and immune cell<sup>16,17</sup>  
496 level have been performed to identify these disease specific compartments. However,  
497 previous studies have concentrated at whole tissues, not distinguishing different immune cell  
498 subsets or, in contrast, focused on a few immune cell subsets thereby likely missing the  
499 complex molecular network underpinning immune mediated diseases. Additionally, it is  
500 important to understand which of the gene subsets contribute to a mechanism within the  
501 different cell populations. A disease may have perturbations occurring at a single cell type or  
502 at multiple cell types with completely different or similar genes being involved. To truly  
503 understand a disease, it is essential to capture these cell-gene networks as holistically as  
504 possible.

505 To address the above-mentioned gap, we used the systems immunology approach of  
506 dissecting diseases using the *immunome* comprising of 40 immune cells, the vast literature on  
507 the available disease network and computational methods to compute and construct DIME  
508 networks. The unique integration of these parts resulted in the novel mechanisms being  
509 captured by our method. In this report, we highlight some of the known mechanisms we  
510 capture from the DIME networks. For example, the role of NETosis and granulocytes in  
511 many of the immune diseases, the role of TGF beta signaling in fibrotic diseases, the role of  
512 BCR signaling and PI3K/AKT pathways in cancer, etc. We further outlined methods to  
513 capture pleiotropy between diseases using the combination of cell-gene commonalities  
514 between the DIME networks of the diseases, to ensure the robust capture of common  
515 mechanism between diseases. We further extend this approach to identify immune  
516 mechanism based drug targets that provides additional support and rationale for drug

517 repurposing. For example, we found from the DIME drug network that several specific  
518 interleukins are involved in Crohn's disease, psoriasis and myocardial infarction. Given the  
519 success of anti-IL therapies in many of the immune related diseases, our results indicate that  
520 the anti-IL therapies might also be a promising option for these immune related diseases.  
521 Likewise, our results indicate that using NSAIDs might be a promising option for cancer  
522 prevention and treatment. However, additional functional experiments and extensive clinical  
523 trials have to be done to support this approach.

524 The DACs and DAGs of the DIME network make it more robust to pinpoint which  
525 mechanism and in which cell type. And this makes it a useful tool to dissect diseases. Hence  
526 we built a shiny app to identify and construct DIME networks for all the diseases in the  
527 DisGeNet, the GWAS network and also for user defined set of genes. The tool also identifies  
528 potential drug targets based on the DIME networks. A caveat is that we focused on 40  
529 different immune cells in this study, certain diseases may have manifestations that may or  
530 may not be perturbed in the immune system or the progenitor cells that we have looked at.  
531 Such diseases should be analyzed with additional data to identify the DACs and the  
532 underlying mechanism. We have built the tool to accommodate and plugin such futuristic or  
533 existing data consisting of gene expression information (coming from single cell or bulk) on  
534 the different cell types apart from those found in the immune system. We believe that this tool  
535 will aid scientist to increase the understanding of disease pathology and facilitate drug  
536 development by better determining drug targets, thereby mitigating risk of failure in late  
537 clinical development.

538

## 539 REFERENCES

- 540 1. Sun, Y. V & Hu, Y.-J. Integrative Analysis of Multi-omics Data for Discovery and  
541 Functional Studies of Complex Human Diseases. *Adv. Genet.* **93**, 147–90 (2016).
- 542 2. Li, Y. & Agarwal, P. A Pathway-Based View of Human Diseases and Disease  
543 Relationships. *PLoS One* **4**, e4346 (2009).
- 544 3. Camp, J. G., Platt, R. & Treutlein, B. Mapping human cell phenotypes to genotypes  
545 with single-cell genomics. *Science (80-. )*. **365**, 1401–1405 (2019).
- 546 4. Rozenblatt-Rosen, O., Stubbington, M. J. T., Regev, A. & Teichmann, S. A. The  
547 Human Cell Atlas: from vision to reality. *Nature* **550**, 451–453 (2017).
- 548 5. Lonsdale, J. *et al.* The Genotype-Tissue Expression (GTEx) project. *Nat. Genet.* **45**,  
549 580–585 (2013).

- 550 6. Ardlie, K. G. *et al.* The Genotype-Tissue Expression (GTEx) pilot analysis:  
551 Multitissue gene regulation in humans. *Science* (80-. ). **348**, 648–660 (2015).
- 552 7. GTEx Consortium *et al.* Genetic effects on gene expression across human tissues.  
553 *Nature* **550**, 204–213 (2017).
- 554 8. Tirosh, I. & Suvà, M. L. Deciphering Human Tumor Biology by Single-Cell  
555 Expression Profiling. *Annu. Rev. Cancer Biol.* **3**, 151–166 (2019).
- 556 9. Keren-Shaul, H. *et al.* A Unique Microglia Type Associated with Restricting  
557 Development of Alzheimer’s Disease. *Cell* **169**, 1276-1290.e17 (2017).
- 558 10. Kuo, D. *et al.* HBEGF+ macrophages in rheumatoid arthritis induce fibroblast  
559 invasiveness. *Sci. Transl. Med.* **11**, eaau8587 (2019).
- 560 11. Knight, J. C. Genomic modulators of the immune response. *Trends Genet.* **29**, 74–83  
561 (2013).
- 562 12. Raj, T. *et al.* Polarization of the Effects of Autoimmune and Neurodegenerative Risk  
563 Alleles in Leukocytes. *Science* (80-. ). **344**, 519–523 (2014).
- 564 13. Quach, H. *et al.* Genetic Adaptation and Neandertal Admixture Shaped the Immune  
565 System of Human Populations. *Cell* **167**, 643-656.e17 (2016).
- 566 14. Lee, M. N. *et al.* Common Genetic Variants Modulate Pathogen-Sensing Responses in  
567 Human Dendritic Cells. *Science* (80-. ). **343**, 1246980–1246980 (2014).
- 568 15. Fairfax, B. P. *et al.* Innate Immune Activity Conditions the Effect of Regulatory  
569 Variants upon Monocyte Gene Expression. *Science* (80-. ). **343**, 1246949–1246949  
570 (2014).
- 571 16. Chen, L. *et al.* Genetic Drivers of Epigenetic and Transcriptional Variation in Human  
572 Immune Cells. *Cell* **167**, 1398-1414.e24 (2016).
- 573 17. Schmiedel, B. J. *et al.* Impact of Genetic Polymorphisms on Human Immune Cell  
574 Gene Expression. *Cell* **175**, 1701-1715.e16 (2018).
- 575 18. SRA-Tools - NCBI. <http://ncbi.github.io/sra-tools/>.
- 576 19. Dobin, A. *et al.* STAR: ultrafast universal RNA-seq aligner. *Bioinformatics* **29**, 15–21  
577 (2013).
- 578 20. Li, H. *et al.* The Sequence Alignment/Map format and SAMtools. *Bioinformatics* **25**,  
579 2078–2079 (2009).
- 580 21. Anders, S., Pyl, P. T. & Huber, W. HTSeq--a Python framework to work with high-  
581 throughput sequencing data. *Bioinformatics* **31**, 166–169 (2015).
- 582 22. Risso, D., Ngai, J., Speed, T. P. & Dudoit, S. Normalization of RNA-seq data using  
583 factor analysis of control genes or samples. *Nat. Biotechnol.* **32**, 896–902 (2014).
- 584 23. Piñero, J. *et al.* DisGeNET: a comprehensive platform integrating information on  
585 human disease-associated genes and variants. *Nucleic Acids Res.* **45**, D833–D839  
586 (2017).
- 587 24. Buniello, A. *et al.* The NHGRI-EBI GWAS Catalog of published genome-wide  
588 association studies, targeted arrays and summary statistics 2019. *Nucleic Acids Res.* **47**,  
589 D1005–D1012 (2019).

- 590 25. Gaujoux, R. & Seoighe, C. A flexible R package for nonnegative matrix factorization.  
591 *BMC Bioinformatics* **11**, 367 (2010).
- 592 26. Brunet, J.-P., Tamayo, P., Golub, T. R. & Mesirov, J. P. Metagenes and molecular  
593 pattern discovery using matrix factorization. *Proc. Natl. Acad. Sci. U. S. A.* **101**, 4164–  
594 9 (2004).
- 595 27. Cotto, K. C. *et al.* DGIdb 3.0: a redesign and expansion of the drug–gene interaction  
596 database. *Nucleic Acids Res.* **46**, D1068–D1073 (2018).
- 597 28. Vergheze, P. B., Castellano, J. M. & Holtzman, D. M. Roles of Apolipoprotein E in  
598 Alzheimer’s Disease and Other Neurological Disorders. *Lancet Neurol.* **10**, 241  
599 (2011).
- 600 29. Costarelli, L., Malavolta, M., Giacconi, R. & Provinciali, M. Dysfunctional  
601 macrophages in Alzheimer Disease: another piece of the ‘macroph-aging’  
602 puzzle? *Aging (Albany, NY)*. **9**, 1865–1866 (2017).
- 603 30. Strittmatter, W. J. *et al.* Apolipoprotein E: high-avidity binding to beta-amyloid and  
604 increased frequency of type 4 allele in late-onset familial Alzheimer disease. *Proc.*  
605 *Natl. Acad. Sci. U. S. A.* **90**, 1977–81 (1993).
- 606 31. Bell, R. D. *et al.* Transport Pathways for Clearance of Human Alzheimer’s Amyloid  $\beta$ -  
607 Peptide and Apolipoproteins E and J in the Mouse Central Nervous System. *J. Cereb.*  
608 *Blood Flow Metab.* **27**, 909–918 (2007).
- 609 32. Sanchez, V. E., Nichols, C., Kim, H. N., Gang, E. J. & Kim, Y.-M. Targeting PI3K  
610 Signaling in Acute Lymphoblastic Leukemia. *Int. J. Mol. Sci.* **20**, (2019).
- 611 33. Biemacka, A., Dobaczewski, M. & Frangogiannis, N. G. TGF- $\beta$  signaling in fibrosis.  
612 *Growth Factors* **29**, 196–202 (2011).
- 613 34. Yipp, B. G. & Kubes, P. NETosis: how vital is it? *Blood* **122**, 2784–94 (2013).
- 614 35. Neutrophil Extracellular Traps in Systemic Sclerosis - Full Text View -  
615 ClinicalTrials.gov. <https://clinicaltrials.gov/ct2/show/NCT03374618>.
- 616 36. M. Artlett, C. The Role of the NLRP3 Inflammasome in Fibrosis. *Open Rheumatol. J.*  
617 **6**, 80–86 (2012).
- 618 37. Yu, Y. & Su, K. Neutrophil Extracellular Traps and Systemic Lupus Erythematosus. *J.*  
619 *Clin. Cell. Immunol.* **4**, (2013).
- 620 38. Lande, R. *et al.* Neutrophils Activate Plasmacytoid Dendritic Cells by Releasing Self-  
621 DNA–Peptide Complexes in Systemic Lupus Erythematosus. *Sci. Transl. Med.* **3**,  
622 73ra19-73ra19 (2011).
- 623 39. Garcia-Romo, G. S. *et al.* Netting Neutrophils Are Major Inducers of Type I IFN  
624 Production in Pediatric Systemic Lupus Erythematosus. *Sci. Transl. Med.* **3**, 73ra20-  
625 73ra20 (2011).
- 626 40. Villanueva, E. *et al.* Netting Neutrophils Induce Endothelial Damage, Infiltrate  
627 Tissues, and Expose Immunostimulatory Molecules in Systemic Lupus Erythematosus.  
628 *J. Immunol.* **187**, 538–552 (2011).
- 629 41. Leffler, J. *et al.* Neutrophil Extracellular Traps That Are Not Degraded in Systemic  
630 Lupus Erythematosus Activate Complement Exacerbating the Disease. *J. Immunol.*

- 631           **188**, 3522–3531 (2012).
- 632   42.   Yang, W.-C. *et al.* Interleukin-4 Supports the Suppressive Immune Responses Elicited  
633           by Regulatory T Cells. *Front. Immunol.* **8**, 1508 (2017).
- 634   43.   Wang, R. *et al.* Association of interleukin 13 gene polymorphisms and plasma IL 13  
635           level with risk of systemic lupus erythematosus. *Cytokine* **104**, 92–97 (2018).
- 636   44.   Gao, W. *et al.* Notch signalling pathways mediate synovial angiogenesis in response to  
637           vascular endothelial growth factor and angiopoietin 2. *Ann. Rheum. Dis.* **72**, 1080–8  
638           (2013).
- 639   45.   Moulton, V. R. & Tsokos, G. C. Abnormalities of T cell signaling in systemic lupus  
640           erythematosus. *Arthritis Res. Ther.* **13**, 207 (2011).
- 641   46.   Crow, M. K. & Rönnblom, L. Report of the inaugural Interferon Research Summit:  
642           interferon in inflammatory diseases. *Lupus Sci. Med.* **5**, e000276 (2018).
- 643   47.   Wagner, G. P. & Zhang, J. The pleiotropic structure of the genotype–phenotype map:  
644           the evolvability of complex organisms. *Nat. Rev. Genet.* **12**, 204–213 (2011).
- 645   48.   Yang, C., Li, C., Wang, Q., Chung, D. & Zhao, H. Implications of pleiotropy:  
646           challenges and opportunities for mining Big Data in biomedicine. *Front. Genet.* **6**, 229  
647           (2015).
- 648   49.   Casciano, F., Pigatto, P. D., Secchiero, P., Gambari, R. & Reali, E. T Cell Hierarchy in  
649           the Pathogenesis of Psoriasis and Associated Cardiovascular Comorbidities. *Front.*  
650           *Immunol.* **9**, 1390 (2018).
- 651   50.   Li, N. & Shi, R.-H. Updated review on immune factors in pathogenesis of Crohn’s  
652           disease. *World J. Gastroenterol.* **24**, 15–22 (2018).
- 653   51.   Todd, N. W., Luzina, I. G. & Atamas, S. P. Molecular and cellular mechanisms of  
654           pulmonary fibrosis. *Fibrogenesis Tissue Repair* **5**, 11 (2012).
- 655   52.   Wynn, T. A. Integrating mechanisms of pulmonary fibrosis. *J. Exp. Med.* **208**, 1339–50  
656           (2011).
- 657   53.   Pattanaik, D., Brown, M., Postlethwaite, B. C. & Postlethwaite, A. E. Pathogenesis of  
658           Systemic Sclerosis. *Front. Immunol.* **6**, 272 (2015).
- 659   54.   Kolahian, S., Fernandez, I. E., Eickelberg, O. & Hartl, D. Immune Mechanisms in  
660           Pulmonary Fibrosis. *Am. J. Respir. Cell Mol. Biol.* **55**, 309–322 (2016).
- 661   55.   Wilton, K. M. & Matteson, E. L. Malignancy Incidence, Management, and Prevention  
662           in Patients with Rheumatoid Arthritis. *Rheumatol. Ther.* **4**, 333–347 (2017).
- 663   56.   Simon, T. A., Thompson, A., Gandhi, K. K., Hochberg, M. C. & Suissa, S. Incidence  
664           of malignancy in adult patients with rheumatoid arthritis: a meta-analysis. *Arthritis*  
665           *Res. Ther.* **17**, 212 (2015).
- 666   57.   Din, F. V. N. *et al.* Effect of aspirin and NSAIDs on risk and survival from colorectal  
667           cancer. *Gut* **59**, 1670–1679 (2010).
- 668   58.   Dubois, R. N. Role of inflammation and inflammatory mediators in colorectal cancer.  
669           *Trans. Am. Clin. Climatol. Assoc.* **125**, 358–72; discussion 372-3 (2014).
- 670   59.   Chesmore, K., Bartlett, J. & Williams, S. M. The ubiquity of pleiotropy in human

- 671 disease. *Hum. Genet.* **137**, 39–44 (2018).
- 672 60. Akobeng, A. K. Crohn's disease: current treatment options. *Arch. Dis. Child.* **93**, 787–  
673 92 (2008).
- 674 61. Ley, K., Rivera-Nieves, J., Sandborn, W. J. & Shattil, S. Integrin-based therapeutics:  
675 biological basis, clinical use and new drugs. *Nat. Rev. Drug Discov.* **15**, 173–83  
676 (2016).
- 677 62. Ellinghaus, D. *et al.* Analysis of five chronic inflammatory diseases identifies 27 new  
678 associations and highlights disease-specific patterns at shared loci. *Nat. Genet.* **48**,  
679 510–518 (2016).
- 680 63. Bernstein, C. N., Sargent, M. & Rector, E. Alteration in expression of beta 2 integrins  
681 on lamina propria lymphocytes in ulcerative colitis and Crohn's disease. *Clin.*  
682 *Immunol.* **104**, 67–72 (2002).
- 683 64. Tsai, Y.-C. & Tsai, T.-F. Anti-interleukin and interleukin therapies for psoriasis: current  
684 evidence and clinical usefulness. *Ther. Adv. Musculoskelet. Dis.* **9**, 277–294 (2017).
- 685 65. Ito, H. *et al.* A pilot randomized trial of a human anti-interleukin-6 receptor  
686 monoclonal antibody in active Crohn's disease. *Gastroenterology* **126**, 989–996  
687 (2004).
- 688 66. O'Reilly, S. Epigenetic modulation as a therapy in systemic sclerosis. *Rheumatology*  
689 **58**, 191–196 (2019).
- 690 67. Ridker, P. M. *et al.* Antiinflammatory Therapy with Canakinumab for Atherosclerotic  
691 Disease. *N. Engl. J. Med.* **377**, 1119–1131 (2017).
- 692 68. Terzić, J., Grivennikov, S., Karin, E. & Karin, M. Inflammation and Colon Cancer.  
693 *Gastroenterology* **138**, 2101-2114.e5 (2010).
- 694 69. Hübel, K. *et al.* Plerixafor with and without chemotherapy in poor mobilizers: results  
695 from the German compassionate use program. *Bone Marrow Transplant.* **46**, 1045–  
696 1052 (2011).
- 697 70. Scleroderma Treatment With Autologous Transplant (STAT) Study - Full Text View -  
698 ClinicalTrials.gov. <https://clinicaltrials.gov/ct2/show/study/NCT01413100>.
- 699
- 700

## 701 **FIGURE LEGENDS**

702

703 **Figure 1: A** Brief overview of methods, highlighting the integration of the 3 layers. **B** MeSH-  
704 MeSH network highlighting different MeSH (disease category) terms as nodes and the edges  
705 represent the genes common between the MeSH terms. Node names in network represent first  
706 two letters of the complete MeSH term as shown in the legend on right. **C-H** Gene  
707 prevalence over different MeSH terms. The degree distribution of genes across **I** MeSH terms  
708 and **J** diseases shown as histogram. **K** heatmap of gene expression across immunome of high  
709 degree genes in the DisGeNet. **L** Gene expression of APOE in the immunome. In **B, E-J**, size  
710 of node represents number of diseases in MeSH term.

711

712 **Figure 2:** DIME network of **A** lymphoid leukemia, **B** systemic scleroderma, **C** pulmonary  
713 fibrosis and **D** systemic lupus erythematosus. Green nodes represent genes, blue represents  
714 cell types and red represents diseases. Size of nodes is proportional to DAG score in genes  
715 and DAC score in cell types.

716

717 **Figure 3: A** Top pleiotropy network of the disease subset of the DisGeNet. Nodes are  
718 diseases that have a minimum degree of 2 nodes. Edges between diseases exist if the  $JI \geq 0.1$   
719 and FET p-value  $\leq 0.01$  of the common DIME network between the diseases. Pleiotropy  
720 analysis between **B** Crohn's disease and psoriasis, **C** systemic scleroderma and pulmonary  
721 fibrosis, and **D** rheumatoid arthritis and colon carcinoma. **B, C, D** Venn diagrams represent  
722 overlap of cell-gene connections between the disease comparisons.  $JI$  and FET p-value are  
723 calculated for overlap in the genes in the DIME network of the diseases.

724

725 **Figure 4: A** Schema showing the different analysis performed in this study from building the  
726 DIME network (part1) to the pleiotropy (part 2) to the DIME-drug network (part3) and to the  
727 pleiotropy-drug network (part 4). **B** DIME-drug network of Crohn's disease. Pleiotropy-drug  
728 network for **C** Crohn's disease and psoriasis, **D** systemic scleroderma and pulmonary fibrosis,  
729 **E** systemic scleroderma and myocardial infarction, and **F** rheumatoid arthritis and colon  
730 carcinoma.

731

732

733 **Supplementary Information**

734

735 **Supplementary Figure 1:** Shows the degree of the top 10 high degree genes for different  
736 MeSH term categories and for all diseases.

737

738 **Supplementary Figure 2:** Heatmap of DAC scores for top weighted feature of 613 diseases  
739 from the DisGeNet.

740

741 **Supplementary Figure 3:** Reactome pathway enrichment analysis of top DAGs in the  
742 different clusters of the DIME network of **A** systemic scleroderma and **B** pulmonary fibrosis.

743

744 **Supplementary Figure 4:** Reactome pathway enrichment analysis of top DAGs in the  
745 different clusters of the DIME network of **A** systemic lupus erythematosus and **B** lymphoid  
746 leukemia.

747

748 **Supplementary Figure 5:** Reactome pathway enrichment analysis of pleiotropy DIME  
749 network of **A** Crohn's disease and psoriasis, **B** systemic scleroderma and pulmonary fibrosis,  
750 and **C** rheumatoid arthritis and colon carcinoma.

751

752 **Supplementary Table 1:** Represents all GEO datasets and samples used to construct the  
753 *immunome*.

754

755 **Supplementary Table 2:** List of genes as potential drug targets identified from the  
756 pleiotropy-drug network analysis. The degree represents the number of diseases in which the  
757 gene was found to be in the DIME-drug network. A total of 613 diseases were analyzed.



A

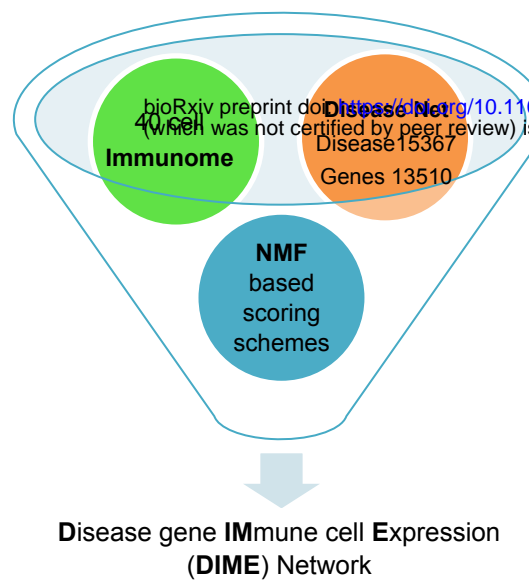

B

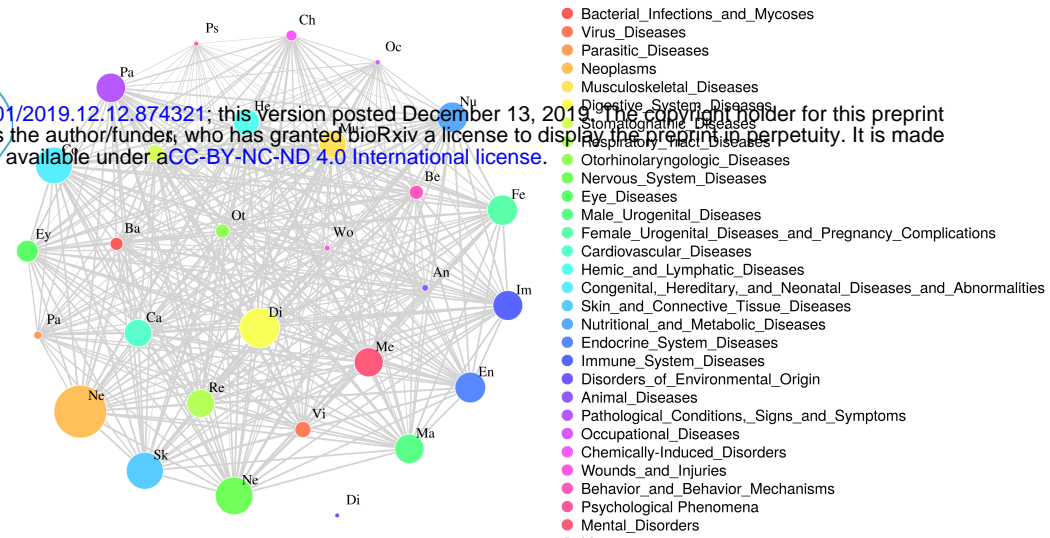

C

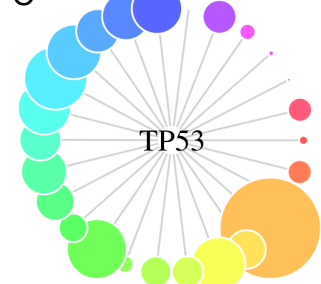

D

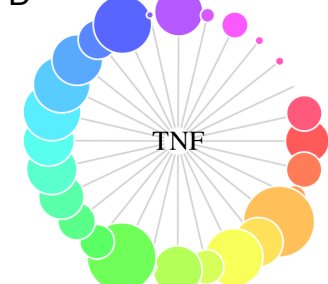

E

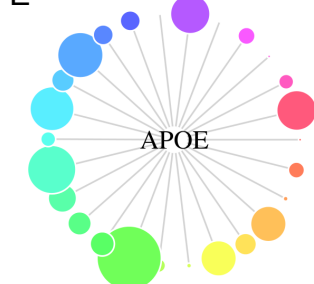

I

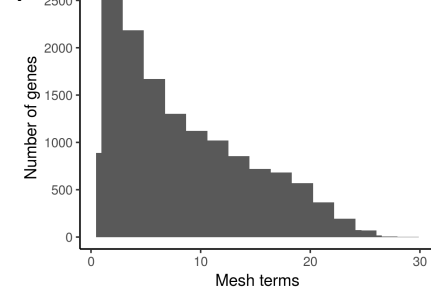

F

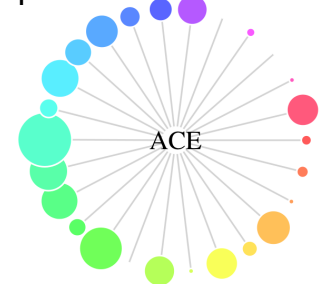

G

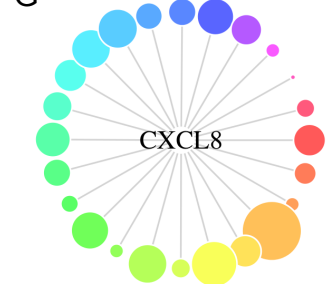

H

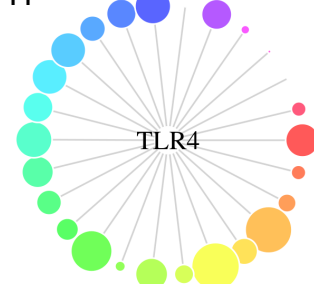

J

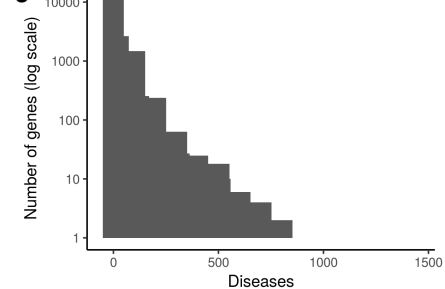

K

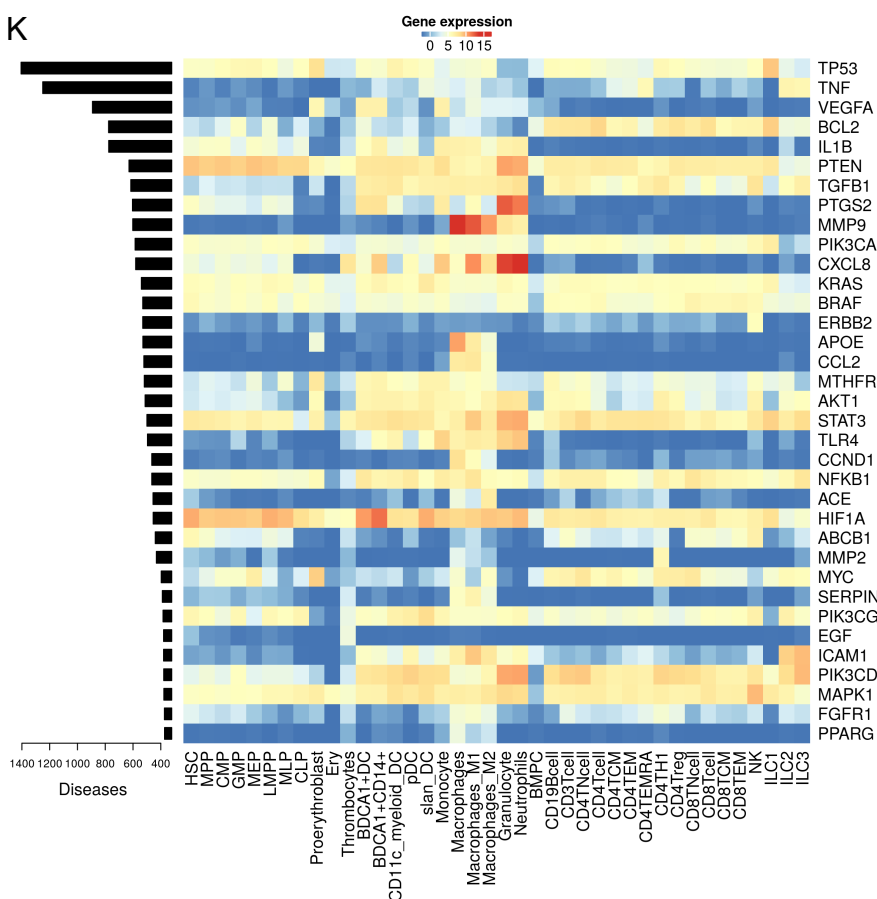

L

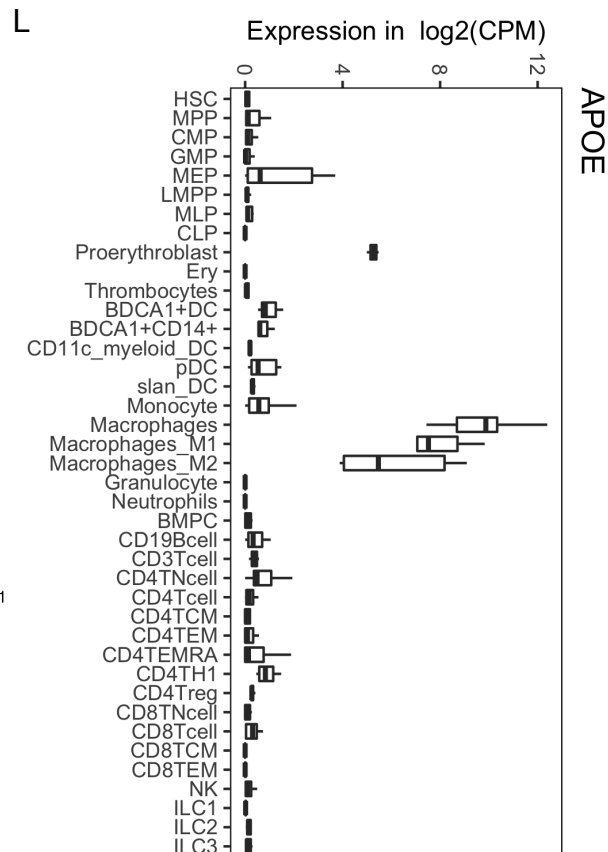

Source: https://www.biorxiv.org/content/biorxiv/early/2019/12/13/2019.12.12.874321.full.pdf
