1           **Integration of immunome with disease-gene network reveals common cellular**  
2                           **mechanisms between IMIDs and drug repurposing strategies**

3           Abhinandan Devaprasad<sup>1,2</sup>, Timothy RDJ Radstake<sup>1,2</sup>, Aridaman Pandit<sup>1,2\*</sup>

4           <sup>1</sup> Division Internal Medicine and Dermatology, University Medical Center Utrecht, Utrecht,  
5           The Netherlands

6           <sup>2</sup> Center for Translation Immunology, University Medical Center Utrecht, Utrecht, The  
7           Netherlands

8           **\*Correspondence:** Aridaman Pandit: [a.pandit@umcutrecht.nl](mailto:a.pandit@umcutrecht.nl)

9  
10       **Abstract**

11       Objective

12       Development and progression of immune-mediated inflammatory diseases (IMIDs) involve  
13       intricate dysregulation of the disease associated genes (DAGs) and their expressing immune  
14       cells. Due to the complex molecular mechanism, identifying the top disease associated cells  
15       (DACs) in IMIDs has been challenging. Here, we aim to identify the top DACs and DAGs to  
16       help understand the cellular mechanism involved in IMIDs and further explore therapeutic  
17       strategies.

18       Method

19       Using transcriptome profiles of 40 different immune cells, unsupervised machine learning,  
20       and disease-gene networks, we constructed the Disease-gene IMmune cell Expression  
21       (DIME) network, and identified top DACs and DAGs of 12 phenotypically different IMIDs.  
22       We compared the DIME networks of IMIDs to identify common pathways between them.  
23       We used the common pathways and publicly available drug-gene network to identify  
24       promising drug repurposing targets.

25       Result

26       We found CD4<sup>+</sup>Treg, CD4<sup>+</sup>Th1, and NK cells as top DACs in the inflammatory arthritis such  
27       as ankylosing spondylitis (AS), psoriatic arthritis, and rheumatoid arthritis (RA); neutrophils,  
28       granulocytes and BDCA1<sup>+</sup>CD14<sup>+</sup> cells in systemic lupus erythematosus and systemic  
29       scleroderma; ILC2, CD4<sup>+</sup>Th1, CD4<sup>+</sup>Treg, and NK cells in the inflammatory bowel diseases  
30       (IBDs). We identified lymphoid cells (CD4<sup>+</sup>Th1, CD4<sup>+</sup>Treg, and NK) and their associated  
31       pathways to be important in HLA-B27 type diseases (psoriasis, AS, and IBDs) and in

32 primary-joint-inflammation-based inflammatory arthritis (AS and RA). Based on the  
33 common cellular mechanisms, we identified lifitegrast as potential drug repurposing  
34 candidate for Crohn's disease, and other IMIDs.

#### 35 Conclusion

36 Our method identified top DACs, DAGs, common pathways, and proposed potential drug  
37 repurposing targets between IMIDs. To extend our method to other diseases, we built the  
38 DIME tool. Thus paving way for future (pre-)clinical research.

39

#### 40 **Keywords**

41 IMIDs; Immune cells; Disease associated cells; Disease associated genes; Drug repurposing;

42 Machine learning

43

## 44 **1. Introduction**

45 The genetic and epigenetic heterogeneity has been known to play a major role in the  
46 development and progression of complex diseases. The past two decades has seen a major  
47 surge in studies that characterize genes and loci associated with diseases [1]. The use of high-  
48 throughput omics technology and functional screenings have boosted our knowledge about  
49 genetic, epigenetic and metabolic factors underlying complex diseases [1]. As a result of  
50 these genetic and epigenetic screenings, we now know that the majority of complex diseases  
51 and genes/loci have a many-to-many relationship meaning that a complex disease is linked to  
52 many different genes and a gene/loci might be associated with many different diseases [2].

53 Large high-throughput screening studies have typically used bulk tissue or whole blood to  
54 study disease associated genes (DAGs). However, the expression of each gene is known to  
55 vary between tissues and cell types [3,4]. Thus, bulk tissue- or blood-based studies on DAGs  
56 do not consider the role played by different cells and tissues in the disease biology. To  
57 improve the understanding and molecular basis of complex diseases, a large number of  
58 research groups and consortiums have started to functionally identify disease associated cells  
59 (DACs) or tissue types [3–7]. The Genotype-Tissue Expression (GTEx) is one such valuable  
60 project, which maps gene expression profiles of 54 different human tissue types and the  
61 corresponding expression quantitative trait loci (eQTLs) [5–7]. Furthermore, the growth of  
62 single cell technologies have advanced our understanding of DACs and have helped in  
63 identifying cell types associated with complex diseases including cancer [8], Alzheimer's [9],  
64 rheumatoid arthritis [10], among others.

65 The immune system is known to play a key role in the development and progression of  
66 immune-mediated as well as non-immune mediated chronic diseases. A large number of  
67 association and functional studies have shown that multiple DAGs are expressed in immune  
68 cells and perturbing these DAGs can modulate immune cell functions [11]. However, very  
69 few studies have explored the impact of DAGs on specific cell types and even fewer on  
70 immune cells, many of which focus on limited number of cell subsets [12–16]. Recently  
71 Schmiedel *et al.* studied the effect of genetic variants on the expression of genes in 13  
72 different immune cell types [17]. However, this study largely focused on the analysis of  
73 genetic variants and their impact on a total of 13 immune cell types: monocytes (classical and  
74 non-classical), NK cells, naïve B-cells and nine sub-populations of T-cells.

75 Immune-mediated inflammatory diseases (IMIDs) are complex in nature, with the  
76 involvement of several different types of immune cells. For example, in rheumatoid arthritis,  
77 the immune cells such as B-cells, T-cells, macrophages, mast cells, dendritic cells, and NK  
78 cells are known to play a major role in the pathogenesis of the disease [18]. Insights on the  
79 exact mechanism of action is crucial for developing successful therapies for the disease. This  
80 becomes particularly challenging for IMIDs due to the involvement of several cell types. The  
81 massive undertaking of GWAS for the IMIDs have enabled mapping of some of the  
82 molecular mechanisms of the IMIDs [19–22]. However, most of these have uncovered only  
83 the tip of the iceberg and further research is required to understand the etiology of these  
84 diseases with respect to the several different immune cells at play, and to identify any  
85 mechanistic overlap between the IMIDs. This approach of identifying the key immune cells  
86 at play and their mechanism in the IMIDs would set a robust rationale for exploring  
87 therapeutic strategies.

88 In this study, we mapped the largest available and expert curated disease-gene network (from  
89 the DisGeNet curated from 16 different databases) [23] on the largest *immunome* data  
90 comprising gene expression profiles of 40 different immune cell types, curated by us. We  
91 further built a tool using an unsupervised machine learning algorithm, the disease-gene  
92 network, and the *immunome* to create the Disease-gene Immune cell Expression (DIME)  
93 network. Hereby, the tool is referred to as the DIME; the analysis using this tool is referred to  
94 as the DIME analysis. Using DIME, we then quantified the effects of 3957 DAGs on the  
95 *immunome*, to identify DACs for 12 phenotypically different IMIDs. We used the DIME to:  
96 (1) study the underlying cell-specific mechanisms; (2) identify common DACs and their top  
97 weighted DAGs (hereby referred to as common cell-gene network) between different pairs of  
98 diseases; and (3) identify drug repurposing targets using the common cell-gene network. The  
99 DIME is available as a user-friendly R tool (<https://bitbucket.org/systemsimmunology/dime>),  
100 to identify the top genes and cells associated with the disease of interest for: (1) diseases from  
101 the DisGeNet, (2) diseases from the EBI genome wide association study (GWAS) catalogue,  
102 or (3) custom set of genes defined by the user.

103

## 104 **2. Methods**

### 105 **2.1. Transcriptome data - *Immunome***

106 The transcriptome data consists of RNA-sequencing datasets of 40 different immune cell  
107 types curated using 316 samples from a total of 27 publicly available datasets (see  
108 Supplementary Table 1 for list of GEO datasets and samples used). The 40 different immune  
109 cells cover the entire hematopoietic stem cell differentiation tree comprising of 9 progenitors,  
110 19 lymphoid, and 12 myeloid cell types. The samples used here were manually curated  
111 considering only the unstimulated (except for macrophages, that were monocyte derived)  
112 immune cells that were sorted using Fluorescence-activated cell sorting (FACS) and were  
113 isolated from either blood, bone marrow or cord blood from healthy donors. The processed,  
114 batch corrected, and normalized data of the 40 immune cells is referred here as the  
115 *immunome* (see Supplementary methods for details).

116

## 117 **2.2. Disease-gene network from DisGeNet**

118 The disease-gene network from DisGeNet [23] was downloaded from the DisGeNet database  
119 ([www.disgenet.org/downloads](http://www.disgenet.org/downloads)). All HLA associated genes was removed from the network,  
120 this was done to ensure that bias towards myeloid cells and B cells are removed, since the  
121 HLA genes are largely expressed by these cells. The resulting network was further filtered to  
122 include only those genes that were present in the *immunome*.

123

## 124 **2.3. IMID disease-gene network**

125 To study and identify the DACs of the IMIDs, the DAGs of 12 IMIDs were extracted from  
126 the above DisGeNet. The IMID gene network for the 12 diseases comprised of 3579 DAGs.  
127 The 12 diseases that broadly represent the IMIDs in this study include: ankylosing spondylitis  
128 (CUI: C0038013), arthritis (CUI: C0003864), Crohn's disease (CUI: C0010346), diabetes  
129 mellitus - non-insulin-dependent (CUI: C0011860), systemic lupus erythematosus (CUI:  
130 C0024141), multiple sclerosis (CUI: C0026769), psoriasis (CUI: C0033860), psoriatic  
131 arthritis (CUI: C0003872), rheumatoid arthritis (CUI: C0003873), Sjogren's syndrome (CUI:  
132 C1527336), systemic scleroderma (CUI: C0036421), and ulcerative colitis (CUI: C0009324).  
133 CUI, used in DisGeNet, is the concept unique identifier for the disease term as defined by  
134 unified medical language system [25]. The disease term arthritis (CUI: C0003864) comprises  
135 DAGs that pan over several arthropathies such as spondyloarthropathy, osteoarthritis, gout,  
136 allergic arthritis, etc., that fall under the broad arthritis MeSH term.

137

## 138 **2.4. Identification of top DAC and DAG using machine learning**

139 We used an unsupervised machine learning algorithm called non-negative matrix  
140 factorization (NMF) to map the disease-gene network to the *immunome*, and identify the top  
141 DACs and DAGs of the 12 IMIDs. The NMF algorithm clusters the input gene expression  
142 data into ‘k’ clusters, such that the DAGs of a cluster are expressed by the DACs of the same  
143 cluster, thus forming DAC-DAG pairs in each cluster [24]. We used the coefficients and  
144 weights identified by the NMF algorithm as the DAC and DAG scores respectively. The  
145 scores were scaled between 0 and 1, with 1 being the highest score. Those in the top 25  
146 percentile of the scores were regarded as the top DACs and DAGs respectively. We  
147 calculated the Frobenius norm for each cluster to weigh and rank the clusters, the rank 1  
148 cluster is referred to as the top cluster. The top cluster comprise the DAC-DAG pair that  
149 which maximally captures/represents the input gene expression matrix. Using the top DAC-  
150 DAG pairs of all clusters, we constructed the Disease-gene IMMune cell Expression (DIME)  
151 network for the 12 IMIDs (see Supplementary methods for details).

152

### 153 **2.5. Common cell-gene network between diseases**

154 To identify common cell-gene network between two diseases, we looked at their overlapping  
155 DAC-DAG pairs in their corresponding DIME networks. These overlapping DAC-DAG pairs  
156 are referred to as the common cell-gene network between the two diseases. Jaccard index (JI)  
157 was used to measure the overlap between the two diseases with Fisher’s exact test (FET) used  
158 to obtain confidence p-value for the given overlap.

159

### 160 **2.6. Integrating drug-gene network**

161 The drug-gene target network was curated from (1) DGIdb with the filter set to contain  
162 ChEMBL interactions pertaining to the drugs approved by the food and drug administration  
163 (FDA) of USA [26] ; (2) all drug-gene of CLUE database [27] and ; (3) all drug-gene of  
164 hPDI [28]. The genes that had drugs associated to them are labelled in the common cell-gene  
165 networks to highlight druggability (Figure 5C-E).

166

### 167 **2.7. Statistical analysis**

168 We performed 1000 jackknife simulations to assess the consistency of the results from the  
169 DIME (Supplementary methods, and Supplementary figure 1-3). Pearson correlation

170 coefficient and p-value were computed to measure significance of the jackknife simulations  
171 in comparison to the original run (Supplementary figure 3).

172

### 173 **3. RESULTS**

174

#### 175 **3.1. Disease-gene network of the 12 IMIDs reveal several common DAGs**

176 In this study, we analyzed different types of IMIDs that include inflammatory arthropathies,  
177 spondyloarthropathies, rheumatic diseases, systemic IMIDs, and inflammatory bowel  
178 diseases (IBDs). The 12 different IMIDs include: ankylosing spondylitis (DAGs:298),  
179 arthritis (DAGs:567), Crohn's disease (DAGs:786), diabetes mellitus - non-insulin-dependent  
180 (DAGs:1415), systemic lupus erythematosus (DAGs:963), multiple sclerosis (DAGs:961),  
181 psoriasis (DAGs:689), psoriatic arthritis (DAGs:177), rheumatoid arthritis (DAGs:1612),  
182 Sjogren's syndrome (DAGs:229), systemic scleroderma (DAGs:494), and ulcerative colitis  
183 (DAGs:796) (Figure 1 A-B). In total, 3957 DAGs were linked to the 12 IMIDs. Among  
184 which, several genes were found to be linked to several IMIDs, for example, 74 DAGs were  
185 linked to only Crohn's disease (CD) and to ulcerative colitis (UC), both IBDs (Figure 1A).  
186 Calculating the Jaccard index and Fisher's exact test (FET) on all the overlapping DAGs  
187 between all IMIDs revealed that CD and UC had the highest significant overlap (Figure 1C).  
188 Interestingly, genes associated with CD had significant overlap (FET p-value  $\leq 0.05$ ) with all  
189 diseases except psoriatic arthritis and diabetes mellitus non-insulin dependent (T2D).  
190 Rheumatoid arthritis (RA) had significant overlap of DAGs with all IMIDs except T2D. T2D  
191 did not have significant overlap of DAGs with any of the IMIDs. Arthritis, psoriasis, CD, and  
192 RA had significant overlap of DAGs between each other. We found 12 DAGs that were  
193 associated with all the 12 IMIDs (Figure 1A, E). These DAGs were related to processes  
194 typically associated with inflammation such as: cytokine signaling (GO:0001817;  
195 GO:0019221), regulation of inflammatory response (GO:0050727), and regulation of  
196 interleukin-6 (GO:0032675; GO:0032635). We further explored the expression of these  
197 DAGs in the *immunome* and found the expression of TNFAIP3 to be the highest in CD8<sup>+</sup> T-  
198 cells, ILC3 and CD4<sup>+</sup> T-cells (Figure 1D, E). Likewise, IL1B was expressed by myeloid and  
199 progenitor cells; TNF was expressed by lymphoid and myeloid cells. Overall, certain myeloid  
200 cells and lymphoid cells, specifically expressed some of the 12 genes that were linked to all  
201 the 12 IMIDs. This intrigued us to identify the key immune cell types and genes that are  
202 important for the 12 IMIDs. Hence, we used the DIME on the 12 IMIDs to identify their top



203 DACs and DAGs. Briefly, DIME uses the *immunome*, input disease-gene network and an  
204 unsupervised machine learning algorithm (NMF) to identify the clusters of top DACs and  
205 DAGs, see methods.

206

### 207 **3.2. Top immune cells of inflammatory arthritis**

208 Inflammatory arthritis is characterized by joint inflammation due to autoimmunity. Joint  
209 inflammation is the primary clinical feature as observed in ankylosing spondylitis (AS) and  
210 RA. However, in other inflammatory arthritis such as the psoriatic arthritis, inflammation is  
211 present in both the skin and joints. Interestingly, AS and psoriatic arthritis are both  
212 seronegative spondyloarthropathies (negative for rheumatoid factor and auto nuclear  
213 antibodies) that are characterized by enthesitis and also have a predominant HLA-B27  
214 genotype [29,30]. We questioned if the inflammatory arthritis shared molecular mechanism,  
215 in addition to sharing clinical features. So, we performed DIME on the different types of  
216 inflammatory arthritis to identify the important DACs and DAGs, and compare the molecular  
217 mechanism shared between them. As a reference, we used the broader arthritis disease term  
218 that encompassed (including inflammatory arthritis) several different kinds of arthropathies,  
219 see methods for disease description.

220

221 The DIME analysis of ankylosing spondylitis revealed lymphoid cells such as NK cells,  
222 ILC3, CD4<sup>+</sup> T-cells (Th1, Treg, TEMRA) as the top DACs in the top cluster (Figure 2A).  
223 The top DAGs of the top cluster were associated with pathways such as interleukin signaling,  
224 antigen presentation, regulation of RUNX3, and BCR signaling (Figure 2E). The role of  
225 RUNX3 in NK cells, CD4<sup>+</sup> and CD8<sup>+</sup> T-cells has been reported to be important in AS [31]. In  
226 the second cluster, the top DACs included myeloid cells and the top DAGs were associated  
227 with pathways such as interleukin (IL-4, IL-10, IL-13) signaling, MAPK3 activation and  
228 MyD88 (Figure 2A, E). Thus, the key DACs of AS were found to be diverse as reported in  
229 the literature, however the top DACs according to DIME were NK cells, ILC3, CD4<sup>+</sup> T-cells  
230 (Th1, Treg, TEMRA) [32].

231

232 The DIME analysis of psoriatic arthritis revealed lymphoid cells such as NK cells, ILC3 and  
233 myeloid cells like the macrophages and BDCA1<sup>+</sup> DC as the top DACs in the top cluster  
234 (Figure 2B). Likewise, T-cells, NK cells and antigen presenting cells have been reported to  
235 play a role in the pathology of psoriatic arthritis [33]. The top DAGs of the top cluster were



236 associated with pathways such as interleukin (IL-4, IL-10, IL-13) signaling, activation of  
237 PI3K, and NF-KB. (Figure 2F). S100 calcium binding proteins like S100A8 and S100A9 are  
238 known to play a role in the regulation of inflammation in psoriatic arthritis [34]. In the second  
239 cluster, we found the top DAGs included the S100 calcium binding proteins, such as S100A9,  
240 and S100A8 that were highly expressed by the granulocytes, neutrophils, monocytes and  
241 dendritic cells (Figure 2B, F).

242

243 The major immune cells involved in RA are T-cells, B-cells, and APCs [35]. While activation  
244 of CD4<sup>+</sup> Th1 and impairment of CD4<sup>+</sup> Tregs have been reported to be important for  
245 rheumatoid arthritis [36], the DIME analysis of RA revealed several lymphoid cells such as  
246 CD4<sup>+</sup> Tregs, CD4<sup>+</sup> Th1, NK cells, etc., as the top DACs in the top cluster (Figure 2C). The  
247 top DAGs of the top cluster were associated with pathways such as interleukin, TCR, FCERI,  
248 and BCR signaling (Figure 2G). In the second cluster, the top DACs included myeloid cells  
249 and the top DAGs were associated with pathways such as interleukin (IL-10, IL-13)  
250 signaling, neutrophil degranulation, and ECM organization (Figure 2C, G). Evidently,  
251 activation, recruitment and apoptosis of neutrophils is altered in RA and under the chronic  
252 inflammatory conditions they release protease-rich granules [37].

253

254 The DIME analysis of the broader arthritis disease term, revealed macrophages as the top  
255 DAC in the top cluster (Figure 2D). Macrophages play a central role in arthropathies, where  
256 they release cytokines and activate several immune cells such as T-cells, monocytes,  
257 neutrophils, and synovial fibroblasts. In addition, they are also the most abundant cells at the  
258 site of inflammation [38]. The top DAGs of the top cluster were associated with pathways  
259 such as interleukin (IL-4, IL-13) signaling, extracellular matrix (ECM) related pathways,  
260 neutrophil degranulation and toll-like receptor (TLR) cascades (Figure 2H). In the second  
261 cluster, the top DACs comprise of neutrophils, granulocytes and the top DAGs were  
262 associated to pathways similar to the top cluster, and also included inflammasomes related  
263 pathways (Figure 2D, H).

264

### 265 **3.3. Top immune cells of systemic IMIDs**

266 We performed the DIME analysis on the systemic IMIDs such as systemic lupus  
267 erythematosus (SLE) and systemic sclerosis (SSc) (Figure 3). SLE and SSc are type I  
268 interferon-mediated systemic autoimmune diseases, that unlike RA, primarily affects not just  
269 the joints, but also the skin, kidney, heart, and other organs [39]. In SLE, the continuous IFN

270 production by pDC and neutrophils leads to activation of monocytes, T-cells, and B-cells  
271 [40]. The DIME analysis of SLE revealed the myeloid cells (granulocytes, macrophages,  
272 BDCA1<sup>+</sup> CD14<sup>+</sup>, monocytes) as the top DACs in the top cluster (Figure 3A). The top DAGs  
273 in the top cluster were associated with pathways such as interleukin signaling (IL-4, IL-13),  
274 neutrophil degranulation, cell surface interactions at the vascular wall and the TLR cascades  
275 (Figure 3C). Incidentally, the neutrophils in SLE undergo spontaneous NETosis (a form of  
276 suicidal cell death) and this process is dependent on TLR signaling [40]. Additionally, T-cells  
277 in SLE are found to have altered cytokine production with higher levels of IL6, IL7, and IL10  
278 secretions [40]. In the second cluster, we found the top DACs included CD4<sup>+</sup> T-cells  
279 (TEMRA, TEM, TCM) and the top DACs were associated with pathways such as  
280 immunoregulatory interactions, Nef-associated factors (TNIP1, TNFAIP3), ZAP-70, VAV1  
281 pathway (Figure 3A, C). Nef-associated factors (TNIP1, TNFAIP3) is known to play a role in  
282 activation of T-cell via TCR signaling in SLE [41].

283

284 The DIME analysis of SSc revealed myeloid cells (neutrophils, granulocytes, BDCA1<sup>+</sup>  
285 CD14<sup>+</sup> cells) and lymphoid cells (NK cells and CD4<sup>+</sup> Treg) as the top DACs in the top cluster  
286 (Figure 3B). The top DAGs in the top cluster were associated with pathways such as  
287 interleukin signaling (IL-4, IL-13), TGF beta signaling, NLR signaling, etc. (Figure 3D). In  
288 the second cluster, the top DACs included macrophages and the top DAGs were associated to  
289 pathways that included IL-10 signaling and degradation of ECM (Figure 3B, D). As  
290 described in the review by Caam et al., several studies have shown neutrophils, macrophages,  
291 NK cells, and Tregs to play a role in the profibrotic events in SSc by the production of  
292 profibrotic cytokines such as TGF beta, IL-4, IL-10, IL-13, etc., thus corroborating our  
293 findings [42].

294

### 295 **3.4. Top immune cells in Inflammatory bowel diseases (IBDs)**

296 We then looked at IMIDs that involve chronic inflammation of the digestive system, these are  
297 categorized as IBDs. The two major forms of IBDs are CD and UC. CD is known to be  
298 driven by CD4<sup>+</sup> Th1 cells, with a dominant Th1 cytokine profile leading to pro-inflammatory  
299 effect [43]. The DIME analysis of CD revealed lymphoid cells (CD4<sup>+</sup> Treg, ILC2, CD4<sup>+</sup>  
300 TEMRA, CD4<sup>+</sup> Th1) as the top DACs in the top cluster (Figure 4A). The top DAGs of the  
301 top cluster were associated with pathways such as interleukin (IL-4, IL-10, IL-13) signaling,  
302 TLR (TLR-5, TLR-10) signaling, MyD88 and neutrophil degranulation (Figure 4C). In the  
303 second cluster, the top DACs included granulocytes, neutrophils, monocytes, macrophages,

304 etc., and the top DAGs were associated with pathways such as interleukin signaling,  
305 neutrophil degranulation and TLR cascades (Figure 4A, C).

306

307 The T-cell profile of UC has been difficult to categorize due to discrepancies in its response  
308 among patients. However, there is evidence of Th2 cells, NK cells, macrophages, and  
309 neutrophils to be involved in the pathogenesis of UC [43]. The DIME analysis of UC  
310 revealed lymphoid cells (ILC2, NK, ILC3, CD4<sup>+</sup> Th1, etc.) as the DACs in the top cluster  
311 (Figure 4B). The top DAGs of the top cluster were associated with pathways such as  
312 interleukin (IL-4, IL-13) signaling, TLR cascades, NLR signaling, neutrophil degranulation,  
313 etc. (Figure 4D). In the second cluster, the top DACs included granulocytes, BDCA1<sup>+</sup> CD14<sup>+</sup>  
314 cells, etc., and the top DAGs were associated with pathways such as interleukin signaling  
315 (IL-4, IL-10, IL-13), neutrophil degranulation and TLR cascades (Figure 4B, D).

316

### 317 **3.5. Statistically significance of DIME results**

318 To evaluate the consistency of results from DIME, we performed 1000 Jackknife simulations  
319 with random subsampling of DAC/DAG and re-identified the top DAC/DAG for all IMIDs  
320 (see Supplementary methods). The jackknife simulations revealed that the top DACs  
321 identified across all clusters in the simulations (Supplementary figure 1A) showed similar  
322 pattern when compared to top DACs identified in the original run (Supplementary figure 1C).  
323 For the top DACs of the top cluster, the pattern from the simulations (Supplementary figure  
324 1B) were comparable to the DAC score of the original run (Supplementary figure 1D). We  
325 used Pearson correlation to compare the pattern observed between the simulations and the  
326 original run, see Supplementary methods. The Pearson correlation between the pattern  
327 observed in simulated run (Supplementary figure 1B), and the DAC scores of the original run  
328 for the top cluster revealed that the top DACs in top cluster were significantly correlated (p-  
329 value  $\leq 0.05$ ) for all the IMIDs except ulcerative colitis (Supplementary figure 3A). This  
330 shows that the top DACs of the top cluster identified by DIME are statistically significant for  
331 all IMIDs, except UC.

332 Likewise, we evaluated the consistency of the top DAGs. In all simulations, the top 10 DAGs  
333 of top cluster of the original run were present as the top DAG in any of the clusters of the  
334 simulated run (Supplementary figure 2). The presence of the top 10 DAGs of top cluster of  
335 the original run as the top DAG in the top cluster of the simulations was also found to be  
336 high. The Pearson correlation between the pattern observed in the simulated run and the DAG  
337 scores of the original run for the top cluster were found to be significantly correlated for all

338 the IMIDs (Supplementary figure 3B, see Supplementary methods). This shows that the top  
339 DAGs of the top cluster identified by DIME are statistically significant for all IMIDs.

340

### 341 **3.6. Why are the top DACs of UC insignificant?**

342 In the case of UC, the top DACs was found to be statistically insignificant from our 1000  
343 jackknife simulations, the top DAGs however, were significant (Supplementary figure 1-3).  
344 We found from 1000 simulations that the lymphoid cells identified by the original run (Figure  
345 4B) were indeed present in the simulations, and in addition, the myeloid cells were also part  
346 of the top DACs of the top cluster in the simulations (Supplementary figure 1B).  
347 Furthermore, we found that the top DAGs of the top cluster included genes associated to  
348 neutrophil degranulation pathways and other myeloid cell related pathways (Figure 4B, D),  
349 thus, owing to the non-convergence of the NMF algorithm in accurately predicting the top  
350 DACs of the top cluster in UC. The top DACs of the top cluster of UC was found to be  
351 ambiguous as has been reported in the literature [43]. From our simulations, we propose the  
352 inclusion of the myeloid cells in the top DACs of the top cluster in addition to the lymphoid  
353 cells previously identified (Figure 4B).

354

### 355 **3.7. Common mechanisms in IMIDs**

356 The DIME analysis revealed that several top DAGs along with their corresponding DACs  
357 were present in many IMIDs. For example, in many IMIDs, the gene FOS was present as top  
358 DAG in the cluster typically containing myeloid cells (granulocytes, neutrophils and dendritic  
359 cells) as the top DACs. We found several genes like FOS, that were present as the top DAG  
360 in the same top DAC cluster between different pairs of diseases. We refer to these top DACs  
361 and DAGs that are present between the two diseases as the common cell-gene network,  
362 represented schematically in Figure 5A, see methods. Using, the common cell-gene network,  
363 we suggest that these diseases may have similar mechanism of action. Such common  
364 mechanisms can be exploited to gain mechanistic insights between diseases and to identify  
365 drug repurposing targets. Hence, we integrated the drug-gene networks (see methods) to  
366 identify and reinforce drug repurposing targets based on the common mechanisms (cell-gene  
367 networks) identified from the DIME analysis, Figure 5A.

368

369 To identify the common mechanisms across the 12 IMIDs, we identified the common cell-  
370 gene networks between all disease comparisons (Figure 5B). Jaccard index and FET was used  
371 to measure the extent and significance of the overlap in the common cell-gene networks

372 between the different pairs of diseases, respectively, see methods. In comparison to the  
373 analysis that looked at all DAGs, which showed several diseases to be statistically significant  
374 in the overlap (Figure 1C), the common cell-gene network overlap was restricted to fewer  
375 diseases (Figure 5B).

376

377 The comparative analysis revealed that CD had statistically significant common cell-gene  
378 networks with several diseases such as AS, psoriasis, RA, and UC (Figure 5B). Among  
379 which, the common cell-gene network of CD and UC had the highest Jaccard index among  
380 all the IMIDs, both being IBDs with aggressive T-cell response [43]. The common cell-gene  
381 network of CD and UC revealed that the top DACs included the lymphoid cells such as CD4<sup>+</sup>  
382 T-cell, CD4<sup>+</sup> Th1, CD4<sup>+</sup> Treg, ILC1, ILC2, ILC3 and NK cells in one cluster (Figure 5C).  
383 CD4<sup>+</sup> Th1 and NK cells are known to be implicated in both CD and UC [43]. The top DAGs  
384 such as CXCR4, IL10RA, IL7R, ETS1, TNFAIP3, PTPRC, SELL, etc., were highly  
385 expressed by cells of the lymphoid cluster. These DAGs were enriched in pathways  
386 associated with interleukin signaling (IL-4 and IL-13), NLR signaling, etc (Supplementary  
387 figure 4A). The other clusters comprised of myeloid cells such as the granulocytes, dendritic  
388 cells, monocytes and macrophages, among which dendritic cells have been crucial for  
389 regulating the T-cell responses in IBDs. The top DAGs such as IL6R, CXCL8, ITGAX,  
390 S100A9, FOS, etc., were highly expressed by the cells of the myeloid cluster. These DAGs  
391 were enriched in pathways associated with interleukin signaling (IL-10), TLR signaling,  
392 ECM degradation, etc (Supplementary figure 4A).

393

394 We next explored the common cell-gene network of the two distinct IMIDs that belonged to  
395 different pathophysiology, namely CD and RA. The common cell-gene network of CD and  
396 RA revealed that the top DACs comprised of the lymphoid cells that included all CD4<sup>+</sup> T-  
397 cells and NK cells in one cluster (Figure 5D). The top DAGs such as CD69, PTPRC,  
398 CXCR4, etc., were highly expressed by the cells of this cluster. These DAGs were enriched  
399 for pathways associated with interleukin, TLR, MyD88 signaling, etc. (Supplementary figure  
400 4B). The other clusters comprised of myeloid cells such as the granulocytes, dendritic cells,  
401 monocytes and macrophages. The top DAGs such as CTSS, ITGB2, ITGAX, MCL1, FOS,  
402 etc., were highly expressed by the cells of this cluster. These DAGs were enriched for  
403 pathways associated with interleukin (IL-4, IL-13) signaling, neutrophil degranulation, etc.  
404 (Supplementary figure 4B).

405

406 In addition to the common cell-gene networks of CD, we also found statistically significant  
407 common cell-gene network between the two inflammatory arthropathies that has joint pain as  
408 the primary feature, namely AS and RA. The common cell-gene network of AS and RA  
409 revealed that the top DACs comprised of the lymphoid cells that included all the T-cells, and  
410 NK cells in one cluster (Figure 5E). The top DAGs such as ITGAL, ETS1, IL2RG,  
411 TNFAIP3, etc., were highly expressed by the cells of this cluster. These DAGs were enriched  
412 for pathways associated with interleukin (IL-1) signaling, FCERI mediated NF- $\kappa$ B  
413 activation, TCR signaling, etc. The other clusters comprised of myeloid cells such as the  
414 granulocytes, dendritic cells, monocytes and macrophages. The top DAGs such as  
415 TNFRSF1B, STAT6, TYK2, were highly expressed by the cells of this cluster. These DAGs  
416 were enriched for pathways associated with interleukin (IL-4, IL-10, IL-13) signaling  
417 (Supplementary figure 4C).

418

419 Thus, using the common cell-gene networks we were able to uncover the common  
420 mechanisms in accordance to the top DACs and DAGs (Figure 5). This revealed several  
421 pathways that are common between the different IMIDs (Supplementary figure 4). Our next  
422 question was to see if these common mechanisms comprised of any drug targets (genes that  
423 are druggable or have drugs that target them). The idea was to identify targets for drug  
424 repurposing based on the drug targets in the common cell-gene networks, this novel method  
425 of computational drug repurposing is a combination of target-based and mechanism-based  
426 drug repurposing strategies [44]. To perform this, we then used the common cell-gene  
427 networks identified here and the drug-gene networks from literature to explore the common  
428 DAGs that were also drug targets (Figure 5C-E, DAGs highlighted by green border), see  
429 methods. We found several DAGs such as IL1B, IL6R, ITGAL, PTGS2, TYK2, NFKB1,  
430 NLRP3, PRKCQ, PTGER4, PTPN2, RELA, SH2B3, SMAD3, TLR2, TLR4, and TREM1,  
431 that were drug targets and present in all the common cell-gene networks shown in Figure 5C-  
432 E. Interestingly, ITGAL was found to be the only DAG that was a drug target and present as  
433 the top DAG of the top cluster (lymphoid cell cluster) in the DIME networks of CD, UC, AS  
434 and RA. Using the drugs associated to these drug targets specifically for these diseases (CD,  
435 UC, AS, and RA) in therapy would require extensive experimental validation and clinical  
436 trials. Therefore, we explored (in the next section) the possibility of using some of these drug  
437 targets for repurposing based on existing studies. Thus, reinforcing and strengthening these  
438 targets and also the validity of our approach in identifying them.

439



### 440 **3.8 Common cell-gene networks from DIME reveals drug targets for repurposing**

441 To explore and validate the drug targets for repurposing, we focused on the top DAGs of the  
442 statistically significant (FET p-value  $\geq$  0.05, Figure 5B) common cell-gene networks of all  
443 IMIDs. To identify drug targets that were targets of FDA approved drugs, we used the drug-  
444 gene network of ChEMBL, see methods. We found several drug targets (Table 1) such as  
445 IL1B, IL6R, ITGAL, and TYK2 to be present in all the statistically significant common cell-  
446 gene networks. Anti-IL1 therapy is used for psoriasis and RA [45–47]. Preliminary studies  
447 indicate that anti-IL1 therapy has shown promising clinical response for treating AS, CD, and  
448 UC [48,49]. Anti-IL6 therapy (tocilizumab) shows positive clinical response in small group  
449 of patients in AS [50], CD [51] and in RA [52]. However, anti-IL6 therapy was found to  
450 have side effects in smaller studies on psoriasis and UC [53,54]. Integrin based therapies  
451 (such as natalizumab and vedolizumab that targets ITGB2) are already in use for CD [55].  
452 Exploring other integrin based therapies (such as Lifitegrast that targets ITGAL and also  
453 ITGB2) for CD may be beneficial since both ITGAL and ITGB2 are top DAGs and are also  
454 implicated in CD [56,57]. Lifitegrast is a promising drug repurposing candidate for CD and  
455 also perhaps for UC, AS, and RA, since its target gene ITGAL, was the only top DAG of the  
456 top cluster (lymphoid cell cluster) that was also a drug target in the DIME networks of these  
457 diseases (Figure 2, 4, 5C-E). Thereby, targeting the same mechanism implicated in these  
458 diseases.

459 Tofacitinib, a TYK2 and JAK2 inhibitor developed for RA is now making way to treatment  
460 options in other diseases such as AS, CD, UC and psoriasis [58–61]. Corticosteroids (drug  
461 target: NR3C1) and the aminosalicylates (drug target: PTGS2 and ALOX5) are current line  
462 of drugs used in treatment of several IMIDs [62]. Plerixafor (drug target : CXCR4) is a drug  
463 currently used in cancer (lymphoma and multiple myeloma), after stem cell transplantation to  
464 initiate migration of stem cells in the bloodstream [63]. This drug is now in clinical trials  
465 (NCT01413100) to be evaluated for use after autologous transplant in patients with SSc. Such  
466 trials may potentially be extended to other IMIDs like psoriasis, CD, RA, and UC, that are  
467 driven by CXCR4 mediated dysregulation of immune system.

468

## 469 **4. Discussion**

470 Despite decades of experimental data, the knowledge on key cell types that are involved in  
471 pathogenesis of the disease still remains limited. To address this gap, we used the *immunome*  
472 comprising 40 immune cells, the disease-gene network and computational methods to



473 identify the important DACs and DAGs of the disease. The integration of these parts resulted  
474 in the novel mechanisms being captured by our method, using which we built a tool called  
475 the DIME. Here, we highlight the important DACs, DAGs, and common mechanisms  
476 captured using DIME for 12 phenotypically different IMIDs. Using DIME, the top DACs  
477 were found to be CD4<sup>+</sup> Treg, CD4<sup>+</sup> Th1, and NK in the inflammatory arthritis (AS, PsA, and  
478 RA); neutrophils, granulocytes and BDCA1<sup>+</sup>CD14<sup>+</sup> cells in SLE and SSc; ILC2, NK, CD4<sup>+</sup>  
479 Th1, and CD4<sup>+</sup> Treg in the IBDs.

480 Lymphoid cells such as CD4<sup>+</sup> Th1, CD4<sup>+</sup> Treg and NK cells were found to be the key players  
481 in inflammatory arthritis (AS, PsA and RA) and IBD (CD and UC). These diseases have been  
482 reported to have an intricate cross play of the above lymphoid cells, where the NK cells  
483 influence the differentiation of CD4<sup>+</sup> Th cells into CD4<sup>+</sup> Th1 and CD4<sup>+</sup> Tregs; CD4<sup>+</sup> Th1  
484 plays a key role in initiation of inflammation by cytokine production; the CD4<sup>+</sup> Tregs are  
485 crucial for immune response modulation [64]. Interestingly, the top DAGs of these diseases  
486 show pathways associated to signaling of IL-4 and IL-13 that are crucial in this cross play,  
487 thus corroborating the results from DIME.

488 Although, our analysis excluded HLA genes to avoid myeloid and B cell bias, the IMIDs  
489 associated with the HLA-B27, such as psoriasis, AS, and IBDs were found to have  
490 statistically significant common-cell gene networks. However, PsA (also associated with  
491 HLA-B27) is not included here, since it did not have statistically significant common-cell  
492 gene network with any of the IMIDs (Figure 5B). Additionally, AS and RA, the two  
493 inflammatory arthritis with joint inflammation as the primary feature, also had statistically  
494 significant common-cell gene network. Thus, showing that the diseases with these shared  
495 clinical features also had common mechanisms as identified by DIME. The common  
496 mechanisms from these networks revealed several lymphoid and myeloid cells, and their  
497 expressing DAGs. The lymphoid cells such as CD4<sup>+</sup> Th1, CD4<sup>+</sup> Treg, and NK was  
498 predominant in all the statistically significant common-cell gene networks, showing that these  
499 diseases were indeed driven largely by the aggressive T-cell response [31–33,43]. Pathways  
500 such as interleukin (IL-4 and IL-13), TLR, TCR signaling, etc., was found to be enriched in  
501 the top DAGs of the common cell-gene networks of these IMIDs. Thus, the common cell-  
502 gene network revealed several common mechanisms between the diseases in accordance to  
503 the top DACs, DAGs, and their associated pathways.

504 We used the information of the common mechanism from the common cell-gene network and  
505 the drug-gene networks to propose potential drug targets for repurposing. This novel  
506 computational drug repurposing strategy, a combination of target-based (literature drug-gene

507 network) and mechanism-based (inferred from DIME) revealed several potential drug targets  
508 such as IL1B, IL6R, ITGAL, PTGS2, TYK2, NFKB1, NLRP3, PRKCQ, PTGER4, PTPN2,  
509 RELA, SH2B3, SMAD3, TLR2, TLR4, and TREM1. Further, we used these mechanism-  
510 based drug targets from DIME and the FDA approved drug-gene network to propose several  
511 drug targets and their drugs that could expedite the drug repurposing process (Table 1). Thus,  
512 we were able to capture drugs targets and their drugs that are currently being targeted or  
513 being explored for use in therapy for the IMIDs. We also found a few novel targets such as  
514 the drug lifitegrast (used for dry eyes) for CD, UC, AS and RA as an alternative to other  
515 integrin-based therapies already in use for CD. Lifitegrast is particularly interesting because it  
516 targets ITGAL, which was found to be important in the lymphoid cell cluster of CD, UC, AS  
517 and RA. Thus, effectively targeting the same mechanism. Perhaps the effect of lifitegrast on  
518 down-regulating lymphoid cell mediated inflammation [65] could be used in these diseases.  
519 Although, Lifitegrast is currently available as eye drops and used to treat only eye  
520 complications, different formulations of this drug can be explored to treat CD, UC, AS and  
521 RA. So far, to our knowledge, the use of drug lifitegrast in the axis of ITGAL, for the  
522 treatment of CD, UC, AS and RA has not been explored. Thus, using DIME, we were able to  
523 propose a novel drug repurposing strategy from the analysis of the 12 IMIDs.

524

## 525 **5. Conclusions**

526 Thus, DIME was helpful in identifying: 1. top DACs, DAGs of the IMIDs, 2. Common  
527 mechanisms between the IMIDs, and 3. drug targets for repurposing. To enable DIME  
528 analysis for other diseases from the DisGeNet, the GWAS network and also for user defined  
529 set of genes, we built the DIME tool as a user-friendly shinyapp. We believe that this tool  
530 will aid scientist to increase the understanding of disease pathology and facilitate drug  
531 development by better determining drug targets, thereby mitigating risk of failure in late  
532 clinical development.

533

## 534 **Data availability**

535 All data presented here are available from the corresponding author upon reasonable request.

536

## 537 **Code availability**

538 DIME tool is available on <https://bitbucket.org/systemsimmunology/dime>.

539

540 **Author contributions**

541 AD and AP were involved in the conception of the study. AD was involved in the data  
542 curation, visualization and R shiny package development. AD and AP were involved in the  
543 data analysis and interpretation. AD and AP drafted the manuscript. TR helped in writing and  
544 revising the manuscript, and discussions about clinical perspective. All the authors revised  
545 the manuscript critically for important intellectual content and approved the submitted  
546 version.

547

548 **Declaration of competing interests**

549 The authors declare no potential competing interests.

550

551 **Acknowledgements**

552 The authors thank Ajinkya Kadu for sharing his expertise in linear algebra and multivariate  
553 analysis. AP would like to acknowledge the Netherlands Organization for Scientific Research  
554 (NWO; Grant number 016.Veni.178.027) for financial support.

555 **References**

- 556 [1] Y. V Sun, Y.-J. Hu, Integrative Analysis of Multi-omics Data for Discovery and  
557 Functional Studies of Complex Human Diseases., *Adv. Genet.* 93 (2016) 147–90.  
558 <https://doi.org/10.1016/bs.adgen.2015.11.004>.
- 559 [2] Y. Li, P. Agarwal, A Pathway-Based View of Human Diseases and Disease  
560 Relationships, *PLoS One.* 4 (2009) e4346.  
561 <https://doi.org/10.1371/journal.pone.0004346>.
- 562 [3] J.G. Camp, R. Platt, B. Treutlein, Mapping human cell phenotypes to genotypes with  
563 single-cell genomics, *Science (80-. ).* 365 (2019) 1401–1405.  
564 <https://doi.org/10.1126/science.aax6648>.
- 565 [4] O. Rozenblatt-Rosen, M.J.T. Stubbington, A. Regev, S.A. Teichmann, The Human  
566 Cell Atlas: from vision to reality, *Nature.* 550 (2017) 451–453.  
567 <https://doi.org/10.1038/550451a>.
- 568 [5] J. Lonsdale, J. Thomas, M. Salvatore, R. Phillips, E. Lo, S. Shad, et al., The Genotype-  
569 Tissue Expression (GTEx) project, *Nat. Genet.* 45 (2013) 580–585.  
570 <https://doi.org/10.1038/ng.2653>.
- 571 [6] K.G. Ardlie, D.S. Deluca, A. V. Segre, T.J. Sullivan, T.R. Young, E.T. Gelfand, et al.,  
572 The Genotype-Tissue Expression (GTEx) pilot analysis: Multitissue gene regulation in  
573 humans, *Science (80-. ).* 348 (2015) 648–660.  
574 <https://doi.org/10.1126/science.1262110>.
- 575 [7] GTEx Consortium, Laboratory, Data Analysis & Coordinating Center (LDACC)—  
576 Analysis Working Group, Statistical Methods groups—Analysis Working Group,  
577 Enhancing GTEx (eGTEx) groups, NIH Common Fund, NIH/NCI, et al., Genetic  
578 effects on gene expression across human tissues, *Nature.* 550 (2017) 204–213.  
579 <https://doi.org/10.1038/nature24277>.
- 580 [8] I. Tirosh, M.L. Suvà, Deciphering Human Tumor Biology by Single-Cell Expression  
581 Profiling, *Annu. Rev. Cancer Biol.* 3 (2019) 151–166. [https://doi.org/10.1146/annurev-](https://doi.org/10.1146/annurev-cancerbio-030518-055609)  
582 [cancerbio-030518-055609](https://doi.org/10.1146/annurev-cancerbio-030518-055609).
- 583 [9] H. Keren-Shaul, A. Spinrad, A. Weiner, O. Matcovitch-Natan, R. Dvir-Szternfeld,  
584 T.K. Ulland, et al., A Unique Microglia Type Associated with Restricting  
585 Development of Alzheimer’s Disease, *Cell.* 169 (2017) 1276-1290.e17.  
586 <https://doi.org/10.1016/j.cell.2017.05.018>.
- 587 [10] D. Kuo, J. Ding, I.S. Cohn, F. Zhang, K. Wei, D.A. Rao, et al., HBEGF+ macrophages  
588 in rheumatoid arthritis induce fibroblast invasiveness., *Sci. Transl. Med.* 11 (2019)

- 589 eaau8587. <https://doi.org/10.1126/scitranslmed.aau8587>.
- 590 [11] J.C. Knight, Genomic modulators of the immune response., *Trends Genet.* 29 (2013)  
591 74–83. <https://doi.org/10.1016/j.tig.2012.10.006>.
- 592 [12] T. Raj, K. Rothamel, S. Mostafavi, C. Ye, M.N. Lee, J.M. Replogle, et al., Polarization  
593 of the Effects of Autoimmune and Neurodegenerative Risk Alleles in Leukocytes,  
594 *Science* (80-. ). 344 (2014) 519–523. <https://doi.org/10.1126/science.1249547>.
- 595 [13] H. Quach, M. Rotival, J. Pothlichet, Y.-H.E. Loh, M. Dannemann, N. Zidane, et al.,  
596 Genetic Adaptation and Neandertal Admixture Shaped the Immune System of Human  
597 Populations, *Cell.* 167 (2016) 643-656.e17. <https://doi.org/10.1016/j.cell.2016.09.024>.
- 598 [14] M.N. Lee, C. Ye, A.-C. Villani, T. Raj, W. Li, T.M. Eisenhaure, et al., Common  
599 Genetic Variants Modulate Pathogen-Sensing Responses in Human Dendritic Cells,  
600 *Science* (80-. ). 343 (2014) 1246980–1246980.  
601 <https://doi.org/10.1126/science.1246980>.
- 602 [15] B.P. Fairfax, P. Humburg, S. Makino, V. Naranbhai, D. Wong, E. Lau, et al., Innate  
603 Immune Activity Conditions the Effect of Regulatory Variants upon Monocyte Gene  
604 Expression, *Science* (80-. ). 343 (2014) 1246949–1246949.  
605 <https://doi.org/10.1126/science.1246949>.
- 606 [16] L. Chen, B. Ge, F.P. Casale, L. Vasquez, T. Kwan, D. Garrido-Martín, et al., Genetic  
607 Drivers of Epigenetic and Transcriptional Variation in Human Immune Cells, *Cell.*  
608 167 (2016) 1398-1414.e24. <https://doi.org/10.1016/j.cell.2016.10.026>.
- 609 [17] B.J. Schmiedel, D. Singh, A. Madrigal, A.G. Valdovino-Gonzalez, B.M. White, J.  
610 Zapardiel-Gonzalo, et al., Impact of Genetic Polymorphisms on Human Immune Cell  
611 Gene Expression, *Cell.* 175 (2018) 1701-1715.e16.  
612 <https://doi.org/10.1016/J.CELL.2018.10.022>.
- 613 [18] H.-Y. Yap, S. Tee, M. Wong, S.-K. Chow, S.-C. Peh, S.-Y. Teow, Pathogenic Role of  
614 Immune Cells in Rheumatoid Arthritis: Implications in Clinical Treatment and  
615 Biomarker Development, *Cells.* 7 (2018) 161. <https://doi.org/10.3390/cells7100161>.
- 616 [19] J. Lim, K. Kim, Genetic variants differentially associated with rheumatoid arthritis and  
617 systemic lupus erythematosus reveal the disease-specific biology, *Sci. Rep.* 9 (2019)  
618 1–7. <https://doi.org/10.1038/s41598-019-39132-2>.
- 619 [20] B. Verstockt, K.G. Smith, J.C. Lee, Genome-wide association studies in Crohn’s  
620 disease: Past, present and future: Past, *Clin. Transl. Immunol.* 7 (2018).  
621 <https://doi.org/10.1002/cti2.1001>.
- 622 [21] J. Bentham, D.L. Morris, D.S. Cunninghame Graham, C.L. Pinder, P. Tomblason,

- 623 T.W. Behrens, et al., Genetic association analyses implicate aberrant regulation of  
624 innate and adaptive immunity genes in the pathogenesis of systemic lupus  
625 erythematosus, *Nat. Genet.* 47 (2015) 1457–1464. <https://doi.org/10.1038/ng.3434>.
- 626 [22] Y. Okada, D. Wu, G. Trynka, T. Raj, C. Terao, K. Ikari, et al., Genetics of rheumatoid  
627 arthritis contributes to biology and drug discovery, *Nature.* 506 (2014) 376–381.  
628 <https://doi.org/10.1038/nature12873>.
- 629 [23] J. Piñero, À. Bravo, N. Queralt-Rosinach, A. Gutiérrez-Sacristán, J. Deu-Pons, E.  
630 Centeno, et al., DisGeNET: a comprehensive platform integrating information on  
631 human disease-associated genes and variants, *Nucleic Acids Res.* 45 (2017) D833–  
632 D839. <https://doi.org/10.1093/nar/gkw943>.
- 633 [24] J.-P. Brunet, P. Tamayo, T.R. Golub, J.P. Mesirov, Metagenes and molecular pattern  
634 discovery using matrix factorization., *Proc. Natl. Acad. Sci. U. S. A.* 101 (2004) 4164–  
635 9. <https://doi.org/10.1073/pnas.0308531101>.
- 636 [25] O. Bodenreider, The Unified Medical Language System (UMLS): Integrating  
637 biomedical terminology, *Nucleic Acids Res.* 32 (2004) D267.  
638 <https://doi.org/10.1093/nar/gkh061>.
- 639 [26] K.C. Cotto, A.H. Wagner, Y.-Y. Feng, S. Kiwala, A.C. Coffman, G. Spies, et al.,  
640 DGIdb 3.0: a redesign and expansion of the drug–gene interaction database, *Nucleic*  
641 *Acids Res.* 46 (2018) D1068–D1073. <https://doi.org/10.1093/nar/gkx1143>.
- 642 [27] A. Subramanian, R. Narayan, S.M. Corsello, D.D. Peck, T.E. Natoli, X. Lu, et al., A  
643 Next Generation Connectivity Map: L1000 Platform and the First 1,000,000 Profiles,  
644 *Cell.* 171 (2017) 1437-1452.e17. <https://doi.org/10.1016/j.cell.2017.10.049>.
- 645 [28] Z. Xie, S. Hu, S. Blackshaw, H. Zhu, J. Qian, hPDI: A database of experimental  
646 human protein-DNA interactions, *Bioinformatics.* 26 (2010).  
647 <https://doi.org/10.1093/bioinformatics/btp631>.
- 648 [29] R.D. Armstrong, G.S. Panayi, K.I. Welsh, Histocompatibility antigens in psoriasis,  
649 psoriatic arthropathy, and ankylosing spondylitis, *Ann. Rheum. Dis.* 42 (1983) 142–  
650 146. <https://doi.org/10.1136/ard.42.2.142>.
- 651 [30] D. McGonagle, W. Gibbon, P. Emery, Classification of inflammatory arthritis by  
652 enthesitis, *Lancet.* 352 (1998) 1137–1140. [https://doi.org/10.1016/S0140-](https://doi.org/10.1016/S0140-6736(97)12004-9)  
653 [6736\(97\)12004-9](https://doi.org/10.1016/S0140-6736(97)12004-9).
- 654 [31] M. Vecellio, C.J. Cohen, A.R. Roberts, P.B. Wordsworth, T.J. Kenna, RUNX3 and T-  
655 bet in immunopathogenesis of ankylosing spondylitis - Novel targets for therapy?,  
656 *Front. Immunol.* 10 (2019) 3132. <https://doi.org/10.3389/fimmu.2018.03132>.

- 657 [32] A. Rezaeiemanesh, M. Abdolmaleki, K. Abdolmohammadi, H. Aghaei, F.D. Pakdel, Y.  
658 Fatahi, et al., Immune cells involved in the pathogenesis of ankylosing spondylitis,  
659 *Biomed. Pharmacother.* 100 (2018) 198–204.  
660 <https://doi.org/10.1016/j.biopha.2018.01.108>.
- 661 [33] D.J. Veale, C. Ritchlin, O. FitzGerald, Immunopathology of psoriasis and psoriatic  
662 arthritis, in: *Ann. Rheum. Dis.*, BMJ Publishing Group Ltd, 2005: pp. ii26–ii29.  
663 <https://doi.org/10.1136/ard.2004.031740>.
- 664 [34] M. Fröhling, T. Vogl, K. Loser, P. Paruzel, P. Blackshear, D. Stumpo, et al., A1.30 A  
665 key role of S100A9 in the pathogenesis of psoriatic arthritis in TTP/S100 deficient  
666 mice, *Ann. Rheum. Dis.* 75 (2016) A13.1-A13. [https://doi.org/10.1136/annrheumdis-](https://doi.org/10.1136/annrheumdis-2016-209124.30)  
667 [2016-209124.30](https://doi.org/10.1136/annrheumdis-2016-209124.30).
- 668 [35] X.X. Hu, Y. jing Wu, J. Zhang, W. Wei, T-cells interact with B cells, dendritic cells,  
669 and fibroblast-like synoviocytes as hub-like key cells in rheumatoid arthritis, *Int.*  
670 *Immunopharmacol.* 70 (2019) 428–434. <https://doi.org/10.1016/j.intimp.2019.03.008>.
- 671 [36] A.P. Cope, H. Schulze-Koops, M. Aringer, The central role of T cells in rheumatoid  
672 arthritis, *Clin. Exp. Rheumatol.* 25 (2007).
- 673 [37] R. Cascão, H.S. Rosário, M.M. Souto-Carneiro, J.E. Fonseca, Neutrophils in  
674 rheumatoid arthritis: More than simple final effectors, *Autoimmun. Rev.* 9 (2010) 531–  
675 535. <https://doi.org/10.1016/j.autrev.2009.12.013>.
- 676 [38] I.A. Udalova, A. Mantovani, M. Feldmann, Macrophage heterogeneity in the context  
677 of rheumatoid arthritis, *Nat. Rev. Rheumatol.* 12 (2016) 472–485.  
678 <https://doi.org/10.1038/nrrheum.2016.91>.
- 679 [39] S. Assassi, M.D. Mayes, F.C. Arnett, P. Gourh, S.K. Agarwal, T.A. McNearney, et al.,  
680 Systemic sclerosis and lupus: Points in an interferon-mediated continuum, *Arthritis*  
681 *Rheum.* 62 (2010) 589–598. <https://doi.org/10.1002/art.27224>.
- 682 [40] B. Matta, B.J. Barnes, Coordination between innate immune cells, type I IFNs and  
683 IRF5 drives SLE pathogenesis, *Cytokine.* 132 (2020) 154731.  
684 <https://doi.org/10.1016/j.cyto.2019.05.018>.
- 685 [41] S.E. Vaughn, L.C. Kottyan, M.E. Munroe, J.B. Harley, Genetic susceptibility to lupus:  
686 the biological basis of genetic risk found in B cell signaling pathways, *J. Leukoc. Biol.*  
687 92 (2012) 577–591. <https://doi.org/10.1189/jlb.0212095>.
- 688 [42] A. Van Caam, M. Vonk, F. Van Den Hoogen, P. Van Lent, P. Van Der Kraan,  
689 Unraveling SSc pathophysiology; The myofibroblast, *Front. Immunol.* 9 (2018) 2452.  
690 <https://doi.org/10.3389/fimmu.2018.02452>.



- 691 [43] R.B. Sartor, Mechanisms of disease: Pathogenesis of Crohn's disease and ulcerative  
692 colitis, *Nat. Clin. Pract. Gastroenterol. Hepatol.* 3 (2006) 390–407.  
693 <https://doi.org/10.1038/ncpgasthep0528>.
- 694 [44] K. Park, A review of computational drug repurposing, *Transl. Clin. Pharmacol.* 27  
695 (2019) 59. <https://doi.org/10.12793/tcp.2019.27.2.59>.
- 696 [45] H. Ito, M. Takazoe, Y. Fukuda, T. Hibi, K. Kusugami, A. Andoh, et al., A pilot  
697 randomized trial of a human anti-interleukin-6 receptor monoclonal antibody in active  
698 Crohn's disease, *Gastroenterology.* 126 (2004) 989–996.  
699 <https://doi.org/10.1053/j.gastro.2004.01.012>.
- 700 [46] Y.-C. Tsai, T.-F. Tsai, Anti-interleukin and interleukin therapies for psoriasis: current  
701 evidence and clinical usefulness., *Ther. Adv. Musculoskelet. Dis.* 9 (2017) 277–294.  
702 <https://doi.org/10.1177/1759720X17735756>.
- 703 [47] R. Alten, J. Gomez-Reino, P. Durez, A. Beaulieu, A. Sebba, G. Krammer, et al.,  
704 Efficacy and safety of the human anti-IL-1beta monoclonal antibody canakinumab in  
705 rheumatoid arthritis: Results of a 12-week, phase II, dose-finding study, *BMC*  
706 *Musculoskelet. Disord.* 12 (2011). <https://doi.org/10.1186/1471-2474-12-153>.
- 707 [48] H. Haibel, M. Rudwaleit, J. Listing, J. Sieper, Open label trial of anakinra in active  
708 ankylosing spondylitis over 24 weeks, *Ann. Rheum. Dis.* 64 (2005) 296–298.  
709 <https://doi.org/10.1136/ard.2004.023176>.
- 710 [49] B. Hügler, F. Speth, J.-P. Haas, Inflammatory bowel disease following anti-interleukin-  
711 1-treatment in systemic juvenile idiopathic arthritis, *Pediatr. Rheumatol.* 15 (2017) 16.  
712 <https://doi.org/10.1186/s12969-017-0147-3>.
- 713 [50] M. Merashli, G. De Marco, M. Podgorski, D. McGonagle, H. Marzo-Ortega, Evidence  
714 of response to IL-6 inhibition in some cases of refractory spondyloarthritis associated  
715 peripheral synovitis, *Ann. Rheum. Dis.* 75 (2016) 1418–1420.  
716 <https://doi.org/10.1136/annrheumdis-2016-209275>.
- 717 [51] S. Danese, S. Vermeire, P. Hellstern, R. Panaccione, G. Rogler, G. Fraser, et al.,  
718 Randomised trial and open-label extension study of an anti-interleukin-6 antibody in  
719 Crohn's disease (ANDANTE I and II), *Gut.* 68 (2019) 40–48.  
720 <https://doi.org/10.1136/gutjnl-2017-314562>.
- 721 [52] N. Nishimoto, J. Hashimoto, N. Miyasaka, K. Yamamoto, S. Kawai, T. Takeuchi, et  
722 al., Study of active controlled monotherapy used for rheumatoid arthritis, an IL-6  
723 inhibitor (SAMURAI): Evidence of clinical and radiographic benefit from an x ray  
724 reader-blinded randomised controlled trial of tocilizumab, *Ann. Rheum. Dis.* 66 (2007)

- 725 1162–1167. <https://doi.org/10.1136/ard.2006.068064>.
- 726 [53] A. Blauvelt, IL-6 Differs from TNF- $\alpha$ : Unpredicted Clinical Effects Caused by IL-6  
727 Blockade in Psoriasis, *J. Invest. Dermatol.* 137 (2017) 541–542.  
728 <https://doi.org/10.1016/j.jid.2016.11.022>.
- 729 [54] R. Atreya, U. Billmeier, T. Rath, J. Mudter, M. Vieth, H. Neumann, et al., First case  
730 report of exacerbated ulcerative colitis after anti-interleukin-6R salvage therapy, *World*  
731 *J. Gastroenterol.* 21 (2015) 12963–12969. <https://doi.org/10.3748/wjg.v21.i45.12963>.
- 732 [55] K. Ley, J. Rivera-Nieves, W.J. Sandborn, S. Shattil, Integrin-based therapeutics:  
733 biological basis, clinical use and new drugs., *Nat. Rev. Drug Discov.* 15 (2016) 173–  
734 83. <https://doi.org/10.1038/nrd.2015.10>.
- 735 [56] D. Ellinghaus, L. Jostins, S.L. Spain, A. Cortes, J. Bethune, B. Han, et al., Analysis of  
736 five chronic inflammatory diseases identifies 27 new associations and highlights  
737 disease-specific patterns at shared loci, *Nat. Genet.* 48 (2016) 510–518.  
738 <https://doi.org/10.1038/ng.3528>.
- 739 [57] C.N. Bernstein, M. Sargent, E. Rector, Alteration in expression of beta 2 integrins on  
740 lamina propria lymphocytes in ulcerative colitis and Crohn’s disease., *Clin. Immunol.*  
741 104 (2002) 67–72. <http://www.ncbi.nlm.nih.gov/pubmed/12139949> (accessed  
742 November 5, 2019).
- 743 [58] D. Van Der Heijde, A. Deodhar, J.C. Wei, E. Drescher, D. Fleishaker, T. Hendriks, et  
744 al., Tofacitinib in patients with ankylosing spondylitis: A phase II, 16-week,  
745 randomised, placebo-controlled, dose-ranging study, *Ann. Rheum. Dis.* 76 (2017)  
746 1340–1347. <https://doi.org/10.1136/annrheumdis-2016-210322>.
- 747 [59] G. Rogler, JAK efficacy in Crohn’s disease, *J. Crohn’s Colitis.* (2019).  
748 <https://doi.org/10.1093/ecco-jcc/jjz186>.
- 749 [60] S. Dhillon, Tofacitinib: A Review in Rheumatoid Arthritis, *Drugs.* 77 (2017) 1987–  
750 2001. <https://doi.org/10.1007/s40265-017-0835-9>.
- 751 [61] F. Tian, Z. Chen, T. Xu, Efficacy and safety of tofacitinib for the treatment of chronic  
752 plaque psoriasis: a systematic review and meta-analysis, *J. Int. Med. Res.* 47 (2019)  
753 2342–2350. <https://doi.org/10.1177/0300060519847414>.
- 754 [62] A.K. Akobeng, Crohn’s disease: current treatment options., *Arch. Dis. Child.* 93  
755 (2008) 787–92. <https://doi.org/10.1136/adc.2007.128751>.
- 756 [63] K. Hübel, M.M. Fresen, H. Salwender, N. Basara, R. Beier, S. Theurich, et al.,  
757 Plerixafor with and without chemotherapy in poor mobilizers: results from the German  
758 compassionate use program, *Bone Marrow Transplant.* 46 (2011) 1045–1052.

- 759 <https://doi.org/10.1038/bmt.2010.249>.
- 760 [64] E. Giancchetti, D.V. Delfino, A. Fierabracci, NK cells in autoimmune diseases:  
761 Linking innate and adaptive immune responses, *Autoimmun. Rev.* 17 (2018) 142–154.  
762 <https://doi.org/10.1016/j.autrev.2017.11.018>.
- 763 [65] V.L. Perez, S.C. Pflugfelder, S. Zhang, A. Shojaei, R. Haque, Lifitegrast, a Novel  
764 Integrin Antagonist for Treatment of Dry Eye Disease, *Ocul. Surf.* 14 (2016) 207–215.  
765 <https://doi.org/10.1016/j.jtos.2016.01.001>.  
766

767 **Figure legends**

768 **Figure 1.** DAGs of IMIDs: **A.** UpSet plot showing the intersection of DAGs of all  
769 comparisons of IMIDs. Comparisons shown only for those disease that have at least 1  
770 intersecting DAG between them. **B.** Barplot showing number of DAGs in each IMID. **C.**  
771 Heatmap depicting Jaccard index and Fisher exact test (FET) p-value calculated for each  
772 IMID comparison. Fisher exact test (FET) p-value denoted by \* (\*\*\*  $\leq$  0.001, \*\*  $\leq$  0.01, and  
773 \*  $\leq$  0.05). **D.** Gene expression of TNFAIP3. **E.** Heatmap depicting gene expression of the 12  
774 genes common to all 12 IMIDs. Gene expression values are measured in  $\log_2(\text{cpm}+1)$ , cpm  
775 denotes counts per million.

776 **Figure 2.** DIME analysis of inflammatory arthritis: DIME heatmaps and pathway enrichment  
777 analysis for the top 25 percentile DAG identified by DIME for ankylosing spondylitis (**A, E**),  
778 psoriatic arthritis (**B, F**), rheumatoid arthritis (**C, G**) and arthritis (**D, H**) respectively. The top  
779 10 DAGs based on the DAG score are labelled in the DIME heatmap.

780 **Figure 3.** DIME analysis of systemic diseases: DIME heatmaps and pathway enrichment  
781 analysis for the top 25 percentile DAG identified by DIME for SLE (**A, C**), and SSc (**B, D**)  
782 respectively.

783 **Figure 4.** DIME analysis of IBDs: DIME heatmaps and pathway enrichment analysis for the  
784 top 25 percentile DAG identified by DIME for Crohn's disease (**A, C**), and ulcerative colitis  
785 (**B, D**) respectively.

786 **Figure 5.** Common mechanisms between IMIDs. **A.** Steps involved in DIME based drug  
787 repurposing using the common cell-gene network. **B.** Jaccard index and FET calculated for  
788 the common cell-gene between two diseases for all disease comparisons. Fisher exact test  
789 (FET) p-value denoted by \* (\*\*\*  $\leq$  0.001, \*\*  $\leq$  0.01, and \*  $\leq$  0.05). Common cell-gene  
790 network of **C.** Crohn's disease and ulcerative colitis. **D.** Crohn's disease and rheumatoid  
791 arthritis. **E.** ankylosing spondylitis and rheumatoid arthritis. The cells are shown in blue.  
792 Color of the DAG is based on the mean gene expression of the DAG in the corresponding  
793 DACs. DAGs that are drug targets have a green border.

794

795

796 **Table 1:** The top DAGs (from **Figure 5E-F**) that are drug targets along with their FDA  
 797 approved drugs.

798

| <b>Drug targets (DAGs)</b> | <b>Diseases</b>                                                                            | <b>Drugs</b>                                                                                                                                                                                                                                                                                                                                                                                                                                                                                                                                                                                                                                                             |
|----------------------------|--------------------------------------------------------------------------------------------|--------------------------------------------------------------------------------------------------------------------------------------------------------------------------------------------------------------------------------------------------------------------------------------------------------------------------------------------------------------------------------------------------------------------------------------------------------------------------------------------------------------------------------------------------------------------------------------------------------------------------------------------------------------------------|
| IL1B                       | Ankylosing spondylitis, Crohn disease, Psoriasis, Rheumatoid arthritis, Ulcerative colitis | canakinumab, rilonacept, anakinra                                                                                                                                                                                                                                                                                                                                                                                                                                                                                                                                                                                                                                        |
| IL6R                       | Ankylosing spondylitis, Crohn disease, Psoriasis, Rheumatoid arthritis, Ulcerative colitis | tocilizumab                                                                                                                                                                                                                                                                                                                                                                                                                                                                                                                                                                                                                                                              |
| ITGAL                      | Ankylosing spondylitis, Crohn disease, Psoriasis, Rheumatoid arthritis, Ulcerative colitis | lifitegrast                                                                                                                                                                                                                                                                                                                                                                                                                                                                                                                                                                                                                                                              |
| TYK2                       | Ankylosing spondylitis, Crohn disease, Psoriasis, Rheumatoid arthritis, Ulcerative colitis | tofacitinib_citrate                                                                                                                                                                                                                                                                                                                                                                                                                                                                                                                                                                                                                                                      |
| PSMB9                      | Ankylosing spondylitis, Crohn disease, Psoriasis, Rheumatoid arthritis                     | bortezomib, carfilzomib, ixazomib_citrate                                                                                                                                                                                                                                                                                                                                                                                                                                                                                                                                                                                                                                |
| DNMT3A                     | Ankylosing spondylitis, Crohn disease, Psoriasis, Ulcerative colitis                       | azacitidine, decitabine                                                                                                                                                                                                                                                                                                                                                                                                                                                                                                                                                                                                                                                  |
| HDAC7                      | Ankylosing spondylitis, Crohn disease, Psoriasis, Ulcerative colitis                       | belinostat, panobinostat_lactate, romidepsin                                                                                                                                                                                                                                                                                                                                                                                                                                                                                                                                                                                                                             |
| JAK2                       | Ankylosing spondylitis, Crohn disease, Psoriasis, Ulcerative colitis                       | baricitinib, ruxolitinib_phosphate, tofacitinib_citrate                                                                                                                                                                                                                                                                                                                                                                                                                                                                                                                                                                                                                  |
| PTGS2                      | Ankylosing spondylitis, Crohn disease, Rheumatoid arthritis, Ulcerative colitis            | acetaminophen, aminosalicylate_potassium, aminosalicylate_sodium, aspirin, balsalazide_disodium, bismuth_subsalicylate, bromfenac_sodium, carprofen, diclofenac, diclofenac_epolamine, diclofenac_potassium, diclofenac_sodium, diflunisal, etodolac, etoricoxib, fenopropfen_calcium, flurbiprofen, flurbiprofen_sodium, ibuprofen, ibuprofen_lysine, ibuprofen_sodium, indomethacin, indomethacin_sodium, ketoprofen, ketorolac_tromethamine, meclofenamate_sodium, meloxicam, mesalamine, nabumetone, naproxen, naproxen_etemesil, naproxen_sodium, nepafenac, olsalazine_sodium, oxaprozin, oxaprozin_potassium, piroxicam, sulfasalazine, sulindac, tolmetin_sodium |
| BCL2                       | Crohn disease, Psoriasis, Rheumatoid arthritis, Ulcerative colitis                         | venetoclax                                                                                                                                                                                                                                                                                                                                                                                                                                                                                                                                                                                                                                                               |
| CXCR4                      | Crohn disease, Psoriasis, Rheumatoid arthritis, Ulcerative colitis                         | plerixafor                                                                                                                                                                                                                                                                                                                                                                                                                                                                                                                                                                                                                                                               |
| IL4R                       | Crohn disease, Psoriasis, Rheumatoid arthritis, Ulcerative colitis                         | dupilumab                                                                                                                                                                                                                                                                                                                                                                                                                                                                                                                                                                                                                                                                |
| IL17RA                     | Crohn disease, Psoriasis, Rheumatoid arthritis                                             | brodalumab                                                                                                                                                                                                                                                                                                                                                                                                                                                                                                                                                                                                                                                               |
| ITGB2                      | Crohn disease, Psoriasis, Rheumatoid arthritis                                             | lifitegrast                                                                                                                                                                                                                                                                                                                                                                                                                                                                                                                                                                                                                                                              |

|        |                                                         |                                                                                                                                                                                                                                                                                                                                                                                                                                                                                                                                                                                                                                                                                                                                                                                                                                                                                                                                                                                                                                                                                                                                                                                                                                                                                                                                      |
|--------|---------------------------------------------------------|--------------------------------------------------------------------------------------------------------------------------------------------------------------------------------------------------------------------------------------------------------------------------------------------------------------------------------------------------------------------------------------------------------------------------------------------------------------------------------------------------------------------------------------------------------------------------------------------------------------------------------------------------------------------------------------------------------------------------------------------------------------------------------------------------------------------------------------------------------------------------------------------------------------------------------------------------------------------------------------------------------------------------------------------------------------------------------------------------------------------------------------------------------------------------------------------------------------------------------------------------------------------------------------------------------------------------------------|
| PSMD7  | Crohn disease, Psoriasis, Rheumatoid arthritis          | bortezomib, carfilzomib, ixazomib_citrate                                                                                                                                                                                                                                                                                                                                                                                                                                                                                                                                                                                                                                                                                                                                                                                                                                                                                                                                                                                                                                                                                                                                                                                                                                                                                            |
| CD86   | Crohn disease, Rheumatoid arthritis, Ulcerative colitis | abatacept, belatacept                                                                                                                                                                                                                                                                                                                                                                                                                                                                                                                                                                                                                                                                                                                                                                                                                                                                                                                                                                                                                                                                                                                                                                                                                                                                                                                |
| CSF2RA | Crohn disease, Rheumatoid arthritis, Ulcerative colitis | sargramostim                                                                                                                                                                                                                                                                                                                                                                                                                                                                                                                                                                                                                                                                                                                                                                                                                                                                                                                                                                                                                                                                                                                                                                                                                                                                                                                         |
| NR3C1  | Crohn disease, Rheumatoid arthritis, Ulcerative colitis | alclometasone_dipropionate, amcinonide, beclomethasone_dipropionate, betamethasone, betamethasone_acetate, betamethasone_benzoate, betamethasone_dipropionate, betamethasone_sodium_phosphate, betamethasone_valerate, budesonide, ciclesonide, clobetasol_propionate, clocortolone_pivalate, cortisone_acetate, deflazacort, desonide, desoximetasone, dexamethasone, dexamethasone_acetate, dexamethasone_sodium_phosphate, diflorasone_diacetate, difluprednate, flumethasone_pivalate, flunisolide, fluocinonide, fluorometholone, fluorometholone_acetate, fluprednisolone, flurandrenolide, fluticasone_furoate, fluticasone_propionate, halcinonide, hydrocortamate_hydrochloride, hydrocortisone, hydrocortisone_acetate, hydrocortisone_butyrate, hydrocortisone_cypionate, hydrocortisone_probutate, hydrocortisone_sodium_phosphate, hydrocortisone_sodium_succinate, hydrocortisone_valerate, loteprednol_etabonate, medrysone, meprednisone, methylprednisolone, methylprednisolone_acetate, methylprednisolone_sodium_succinate, mifepristone, mometasone_furoate, paramethasone_acetate, prednicarbate, prednisolone, prednisolone_acetate, prednisolone_sodium_phosphate, prednisolone_tebutate, prednisone, rimexolone, triamcinolone, triamcinolone_acetonide, triamcinolone_diacetate, triamcinolone_hexacetonide |
| P4HB   | Crohn disease, Rheumatoid arthritis, Ulcerative colitis | lomitapide_mesylate                                                                                                                                                                                                                                                                                                                                                                                                                                                                                                                                                                                                                                                                                                                                                                                                                                                                                                                                                                                                                                                                                                                                                                                                                                                                                                                  |
| IL2RB  | Ankylosing spondylitis, Rheumatoid arthritis            | basiliximab, daclizumab                                                                                                                                                                                                                                                                                                                                                                                                                                                                                                                                                                                                                                                                                                                                                                                                                                                                                                                                                                                                                                                                                                                                                                                                                                                                                                              |
| IL2RG  | Ankylosing spondylitis, Rheumatoid arthritis            | basiliximab, daclizumab                                                                                                                                                                                                                                                                                                                                                                                                                                                                                                                                                                                                                                                                                                                                                                                                                                                                                                                                                                                                                                                                                                                                                                                                                                                                                                              |
| PSMB8  | Ankylosing spondylitis, Rheumatoid arthritis            | bortezomib, carfilzomib, ixazomib_citrate                                                                                                                                                                                                                                                                                                                                                                                                                                                                                                                                                                                                                                                                                                                                                                                                                                                                                                                                                                                                                                                                                                                                                                                                                                                                                            |
| ALOX5  | Crohn disease, Rheumatoid arthritis                     | balsalazide_disodium, meclofenamate_sodium, mesalamine, olsalazine_sodium, sulfasalazine, zileuton                                                                                                                                                                                                                                                                                                                                                                                                                                                                                                                                                                                                                                                                                                                                                                                                                                                                                                                                                                                                                                                                                                                                                                                                                                   |

800 **Supplementary Table 1:** GEO datasets and samples used to construct the immunome.



A

bioRxiv preprint doi: <https://doi.org/10.1101/2019.12.12.874321>; this version posted January 22, 2021. The copyright holder for this preprint (which was not certified by peer review) is the author/funder, who has granted bioRxiv a license to display the preprint in perpetuity. It is made available under aCC-BY-NC-ND 4.0 International license.

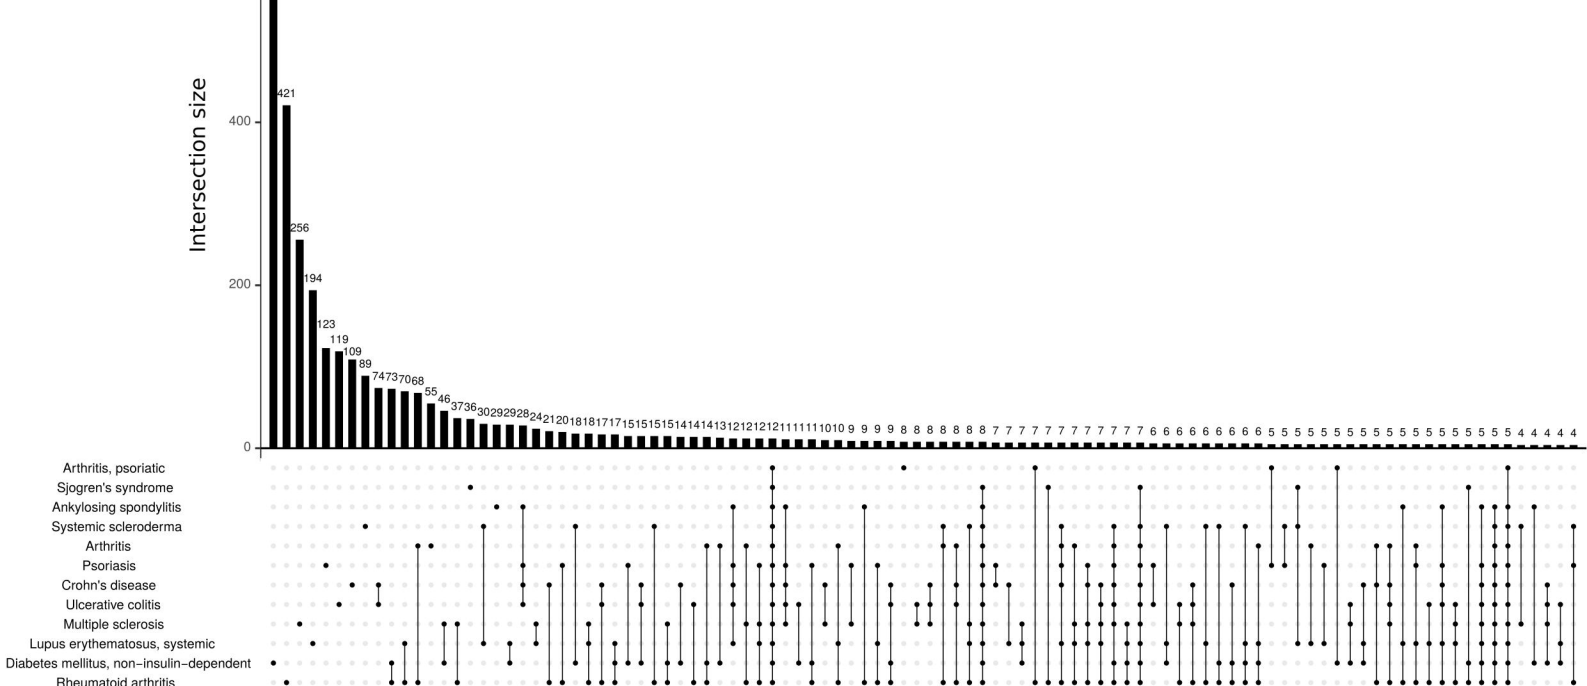

B

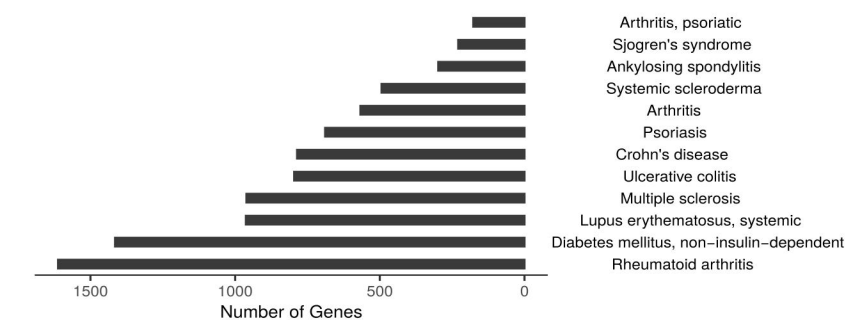

C

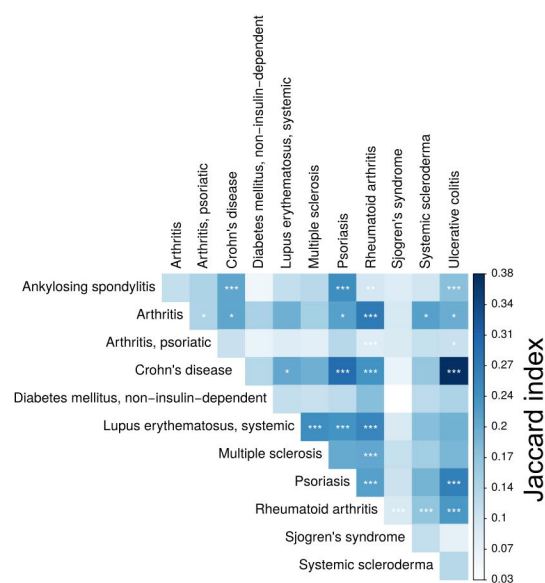

D

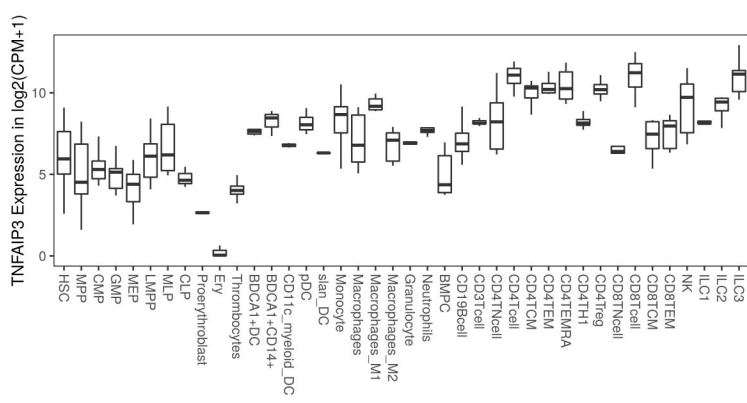

E

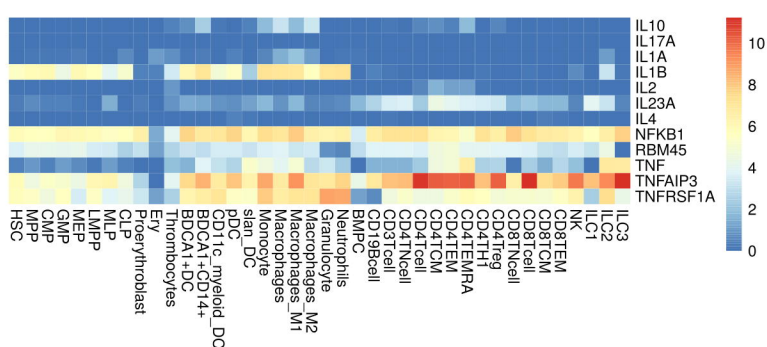

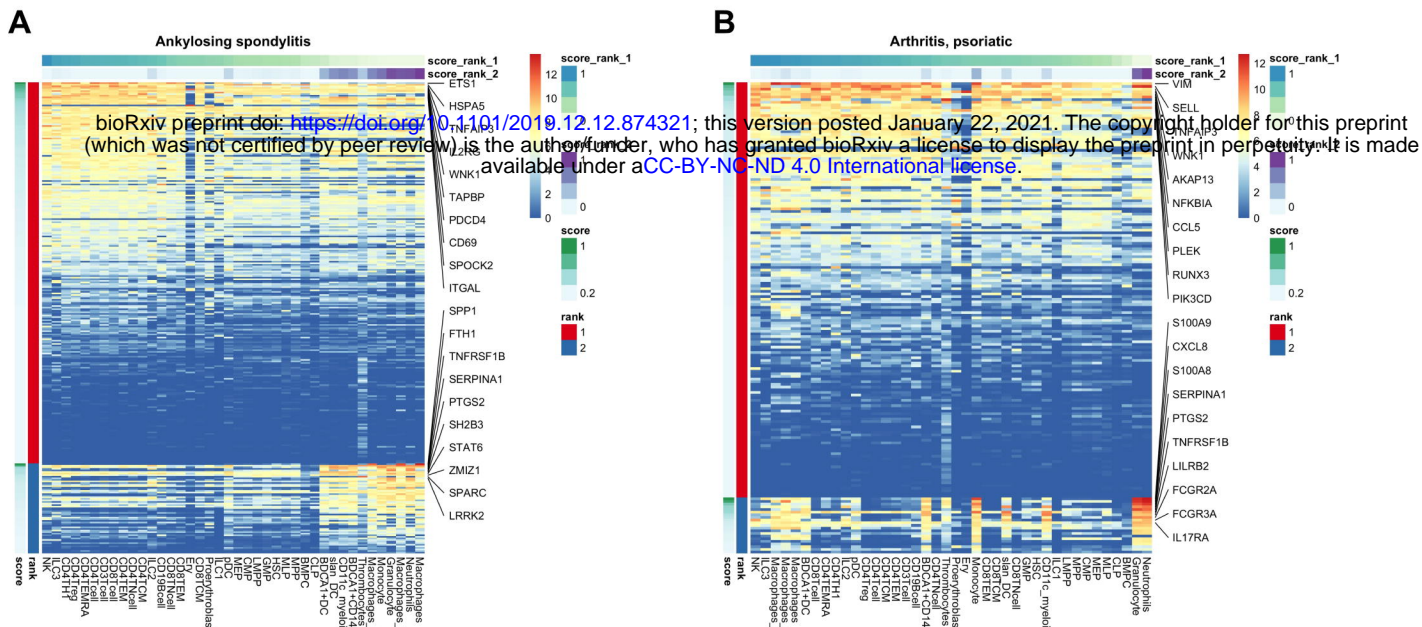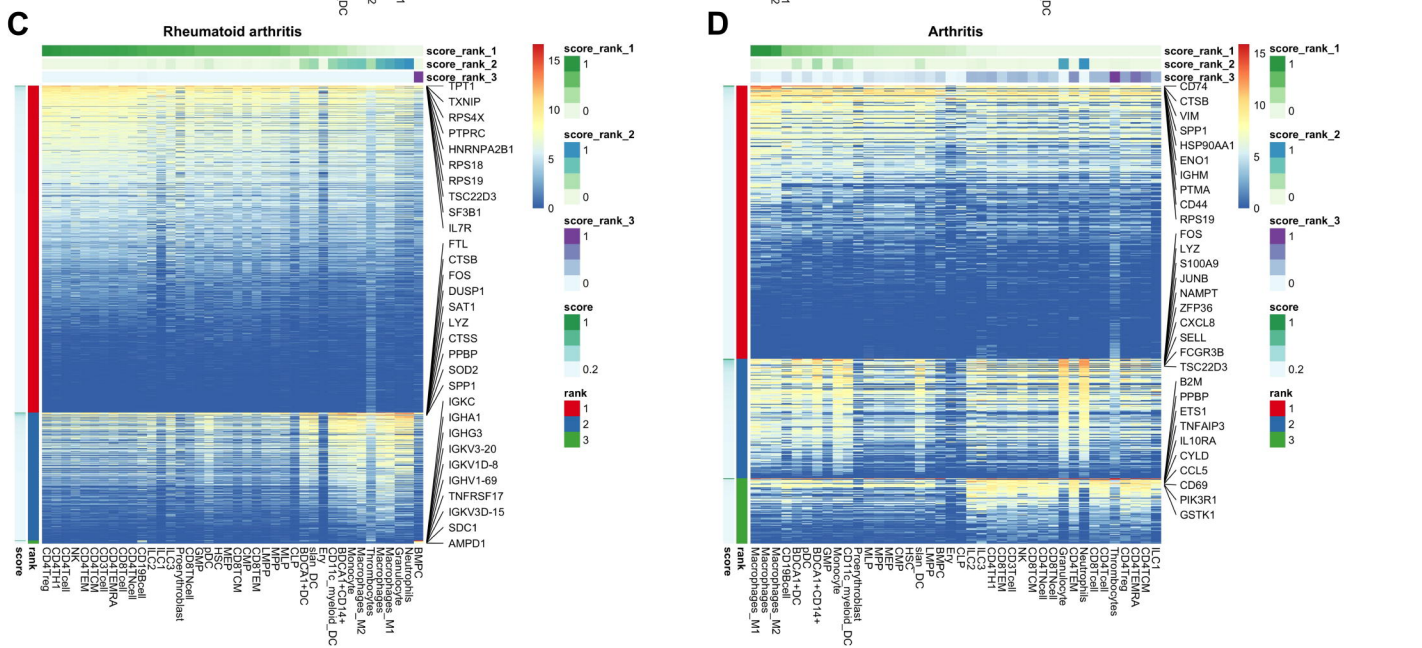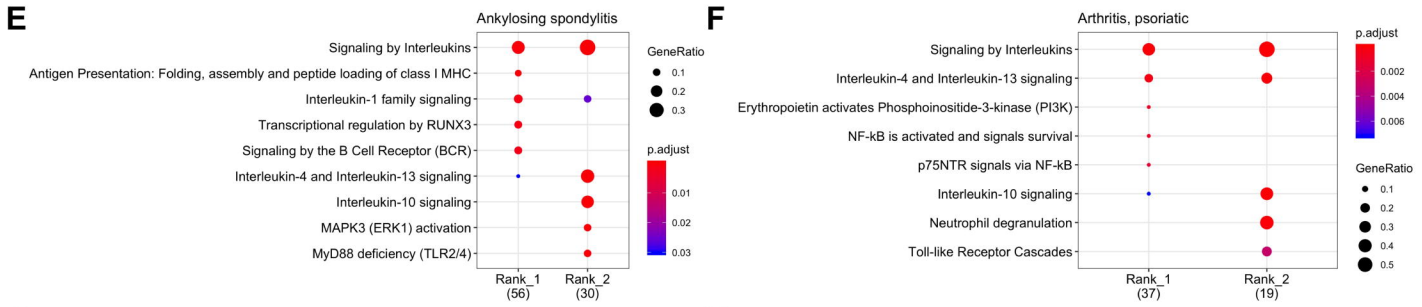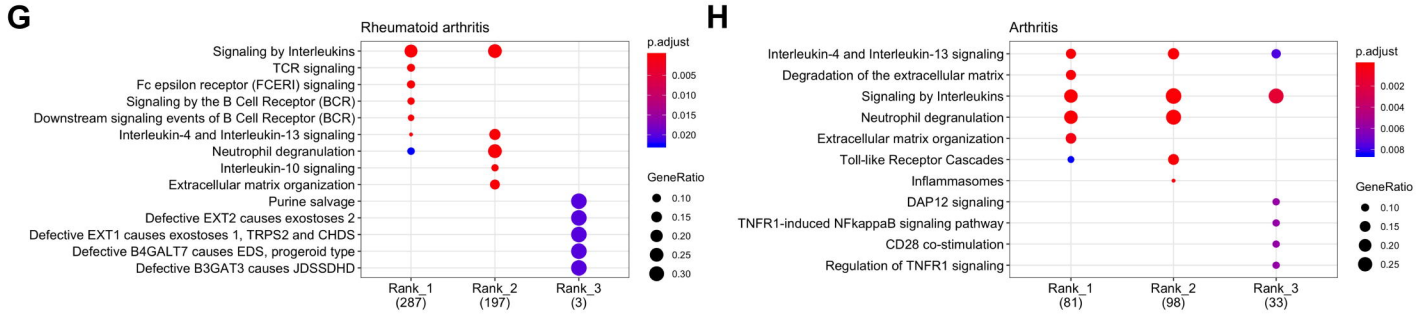

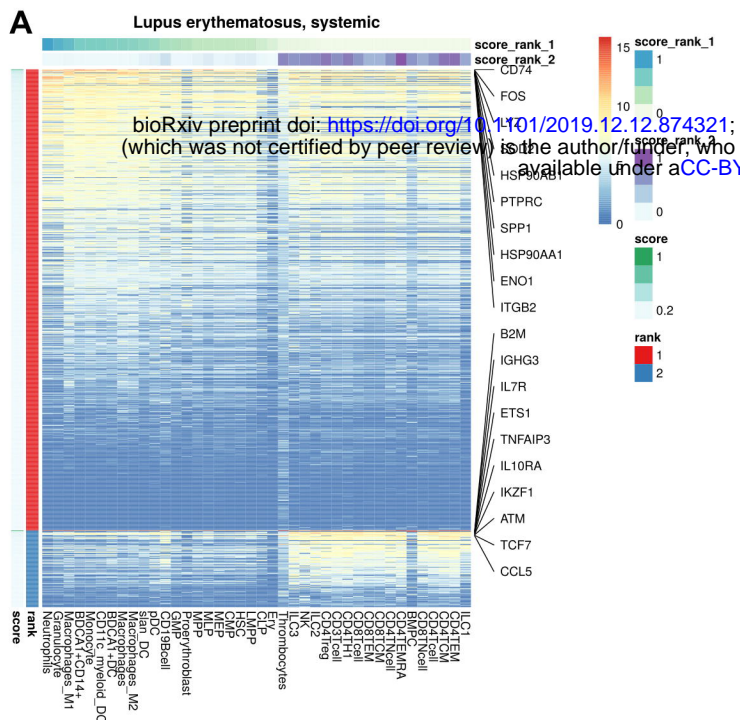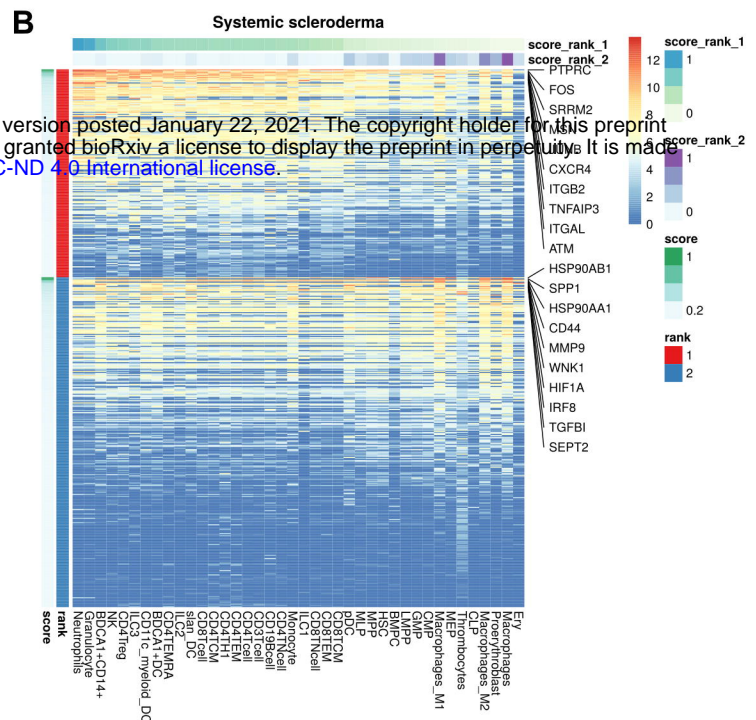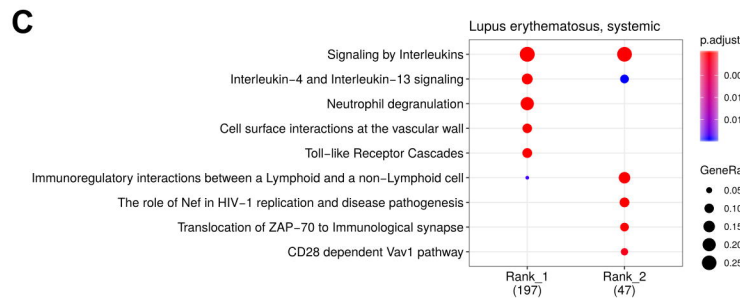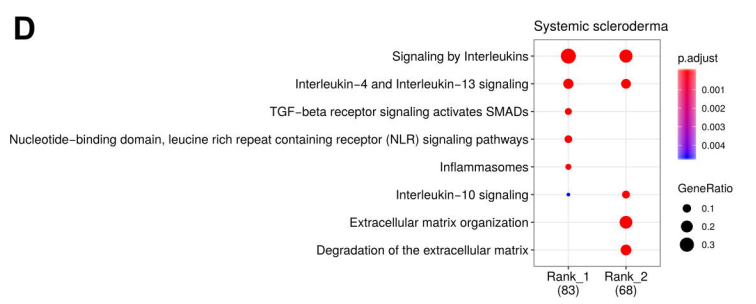



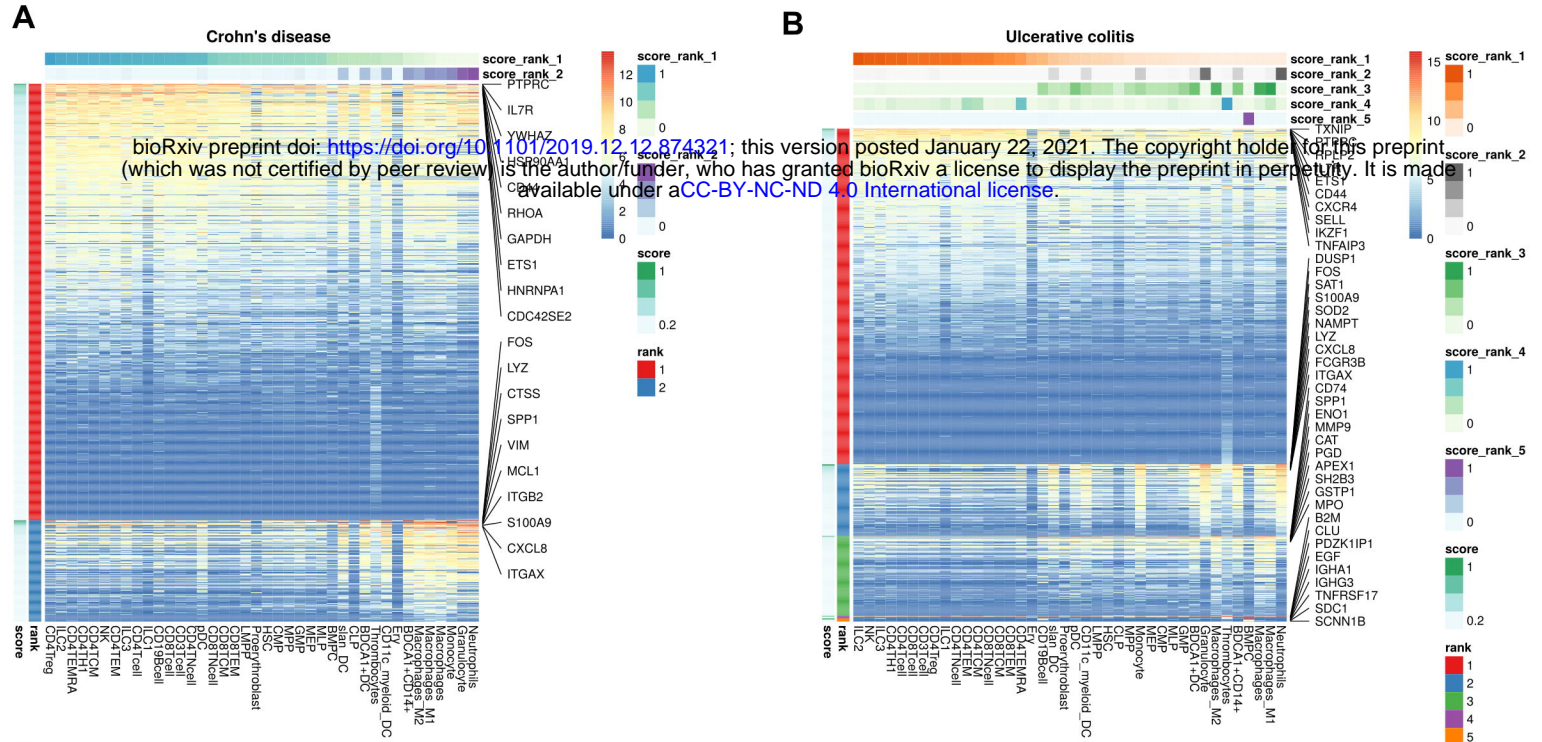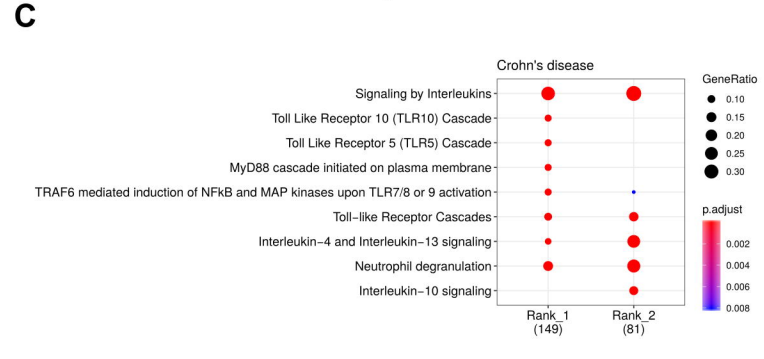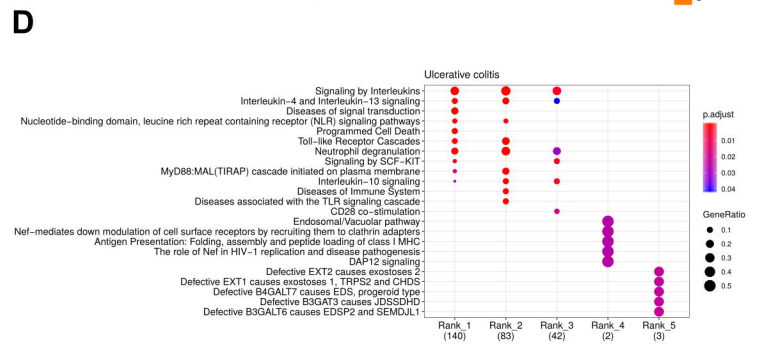

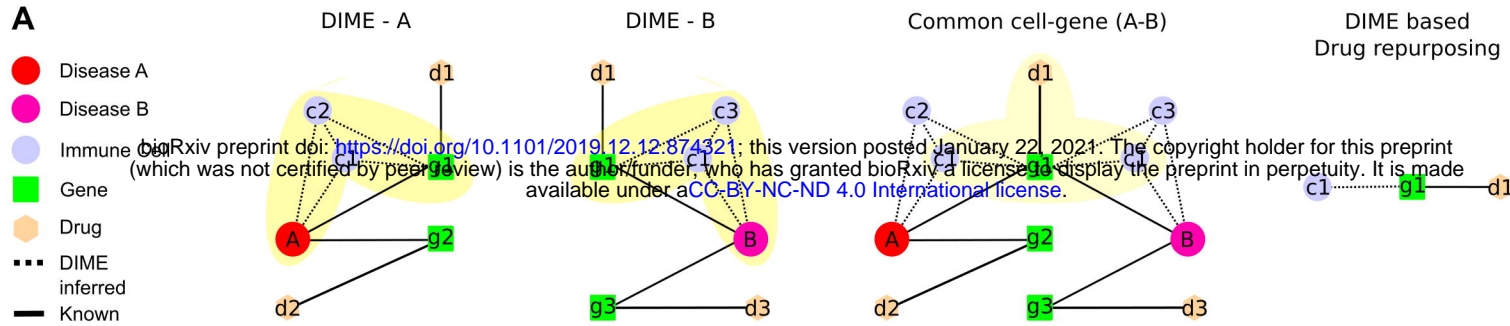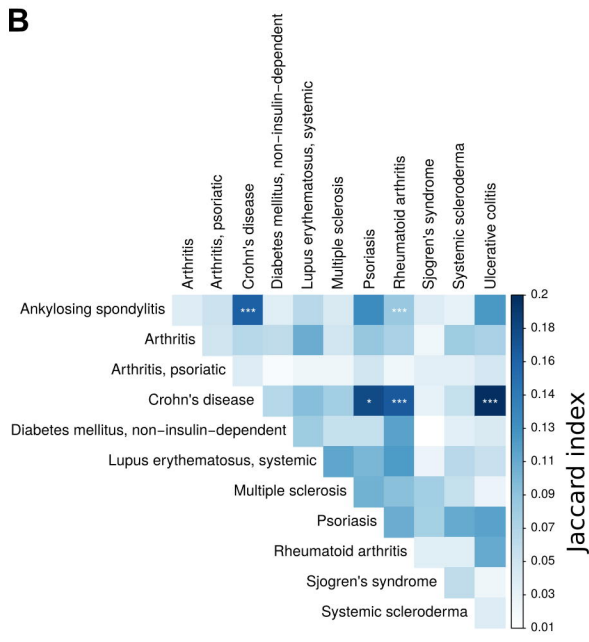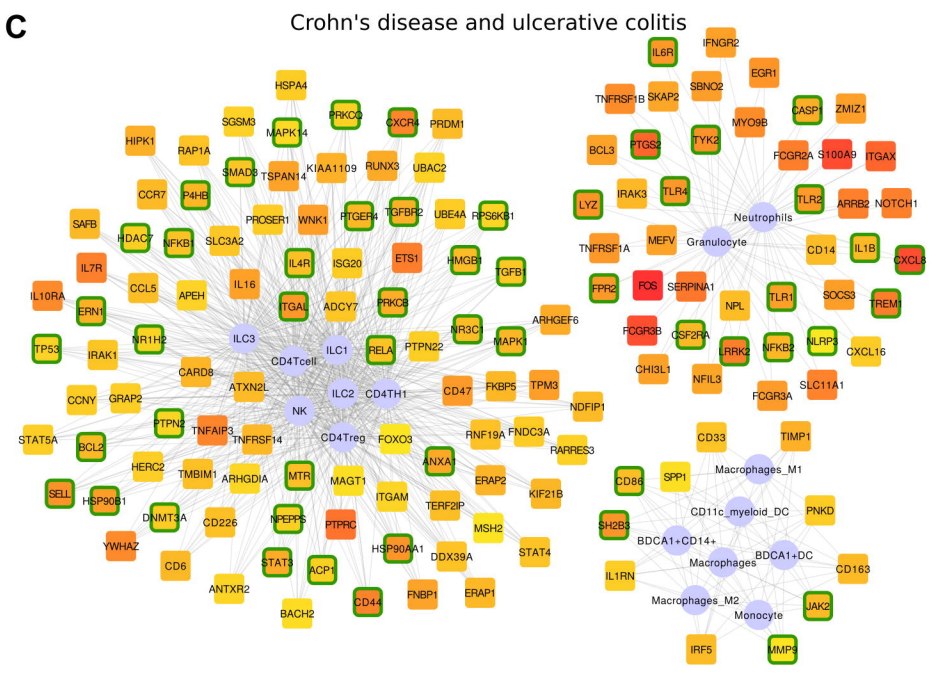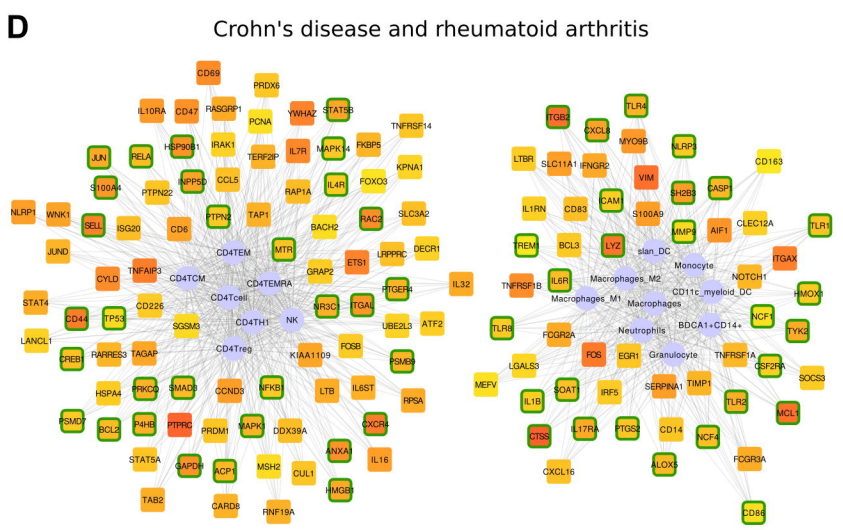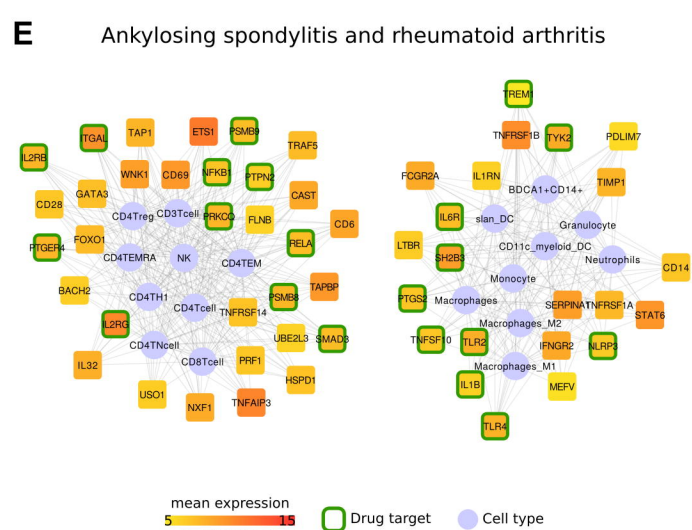

Source: https://www.biorxiv.org/content/biorxiv/early/2021/01/22/2019.12.12.874321.full.pdf
